# Supplementary material for: Precise gene models using long-read sequencing reveal a unique poly(A) signal in Giardia lamblia
Source: bioRxiv preprint, doi:10.1101/2021.04.06.438666, version 1 (2021-04-06)
Supplement: Supplemental Table 1 [file 438666_file02.xlsx]

## Sheet: Singles
gene_id	utr_length	product_description
GL50803_113531	68	High cysteine membrane protein EGF-like
GL50803_103001	22	VSP
GL50803_39117	115	hypothetical protein
GL50803_13783	25	hypothetical protein
GL50803_4950	248	hypothetical protein
GL50803_27293	115	hypothetical protein
GL50803_103007	274	unspecified product
GL50803_2421	81	Cyst wall protein 3
GL50803_2419	52	hypothetical protein
GL50803_21444	95	Spindle pole protein, putative
GL50803_19389	463	unspecified product
GL50803_13809	212	hypothetical protein
GL50803_26129	5	hypothetical protein
GL50803_31617	138	hypothetical protein
GL50803_1908	30	DHHC-type zinc finger domain-containing protein
GL50803_15251	43	hypothetical protein
GL50803_29252	70	hypothetical protein
GL50803_10606	119	CCR4-NOT transcription complex, subunit 7
GL50803_10608	47	hypothetical protein
GL50803_101824	705	hypothetical protein
GL50803_10609	49	Kinase, STE STE20
GL50803_15252	9	Ubiquitin-conjugating enzyme E2-17 kDa 3
GL50803_10612	24	Phosphotyrosyl phosphatase activator protein, putative
GL50803_41212	14	hypothetical protein
GL50803_13584	35	hypothetical protein
GL50803_95787	1003	hypothetical protein
GL50803_95786	227	hypothetical protein
GL50803_3603	637	hypothetical protein
GL50803_2352	10	hypothetical protein
GL50803_12981	26	Ribosomal protein S5
GL50803_38209	754	hypothetical protein
GL50803_33866	27	hypothetical protein
GL50803_17046	37	Protein 21.1
GL50803_1875	26	hypothetical protein
GL50803_88167	16	hypothetical protein
GL50803_2201	230	hypothetical protein
GL50803_14347	1152	hypothetical protein
GL50803_14346	20	hypothetical protein
GL50803_35596	268	unspecified product
GL50803_4558	22	Deoxyguanosine kinase/deoxyadenosine kinase subunit, putative
GL50803_93601	128	hypothetical protein
GL50803_9659	1130	hypothetical protein
GL50803_15011	31	hypothetical protein
GL50803_9662	46	Ferredoxin Fd1, Fd2
GL50803_137706	2155	Kinase, NEK
GL50803_101994	938	hypothetical protein
GL50803_18803	11	unspecified product
GL50803_29774	1366	hypothetical protein
GL50803_16985	75	hypothetical protein
GL50803_12157	1444	RabB
GL50803_15591	7	Coiled-coil protein
GL50803_12163	70	hypothetical protein
GL50803_12162	25	Phenylalanyl-tRNA synthetase alpha chain
GL50803_114671	9	Protein 21.1
GL50803_114192	18	Kinase, NEK
GL50803_137614	32	VSP AS12
GL50803_94525	63	hypothetical protein
GL50803_7655	53	hypothetical protein
GL50803_7652	1477	Translation initiation factor
GL50803_7649	16	DNA ligase
GL50803_37897	1312	hypothetical protein
GL50803_24279	9	hypothetical protein
GL50803_94510	34	Tenascin-X precursor
GL50803_3493	404	hypothetical protein
GL50803_112932	28	hypothetical protein
GL50803_3491	1006	hypothetical protein
GL50803_3490	7	Kinase, NEK
GL50803_13372	25	Spindle pole protein, putative
GL50803_39210	256	hypothetical protein
GL50803_4977	246	Kinase, NEK-frag
GL50803_27308	74	Dynein light chain
GL50803_25951	103	unspecified product
GL50803_16006	147	hypothetical protein
GL50803_89112	18	MCM5
GL50803_39213	651	unspecified product
GL50803_33166	32	26S proteasome non-ATPase regulatory subunit 2
GL50803_2851	41	Histone acetyltransferase MYST2
GL50803_112113	33	VSP
GL50803_2285	174	hypothetical protein
GL50803_4026	16	Alpha-19 giardin
GL50803_30851	45	hypothetical protein
GL50803_24695	72	hypothetical protein
GL50803_3822	11	Dipeptidyl-peptidase III
GL50803_15888	27	hypothetical protein
GL50803_18374	209	unspecified product
GL50803_3581	89	hypothetical protein
GL50803_3538	118	hypothetical protein
GL50803_14745	48	Protein 21.1
GL50803_8619	146	Zinc finger domain protein
GL50803_8621	26	Leucyl-tRNA synthetase
GL50803_8627	27	hypothetical protein
GL50803_22204	287	Methionyl-tRNA synthetase
GL50803_13727	23	VSP
GL50803_13342	27	hypothetical protein
GL50803_7035	16	hypothetical protein
GL50803_33769	21	NADH oxidase lateral transfer candidate
GL50803_7031	37	Spindle pole protein, putative
GL50803_7030	17	Prefoldin subunit 3, putative
GL50803_88765	28	Cytosolic HSP70
GL50803_7021	39	Protein 21.1
GL50803_28064	473	hypothetical protein
GL50803_101810	421	Phospholipid-transporting ATPase IIB, putative
GL50803_35670	6	Zinc finger domain protein
GL50803_16588	28	hypothetical protein
GL50803_1590	222	hypothetical protein
GL50803_41701	502	O-linked GlcNAc transferase
GL50803_22677	39	Nitroreductase Fd-NR2
GL50803_6148	27	Alanyl dipeptidyl peptidase
GL50803_3409	158	Coiled-coil protein
GL50803_3408	139	U2 small nuclear ribonucleoprotein A, putative
GL50803_22543	84	hypothetical protein
GL50803_3180	143	Dolichol-phosphate mannosyltransferase, putative
GL50803_14818	40	hypothetical protein
GL50803_35153	1540	hypothetical protein
GL50803_8955	541	hypothetical protein
GL50803_35150	462	hypothetical protein
GL50803_8963	1153	hypothetical protein
GL50803_16495	182	Phosphatidylserine decarboxylase proenzyme
GL50803_8968	69	hypothetical protein
GL50803_8974	23	hypothetical protein
GL50803_16492	16	hypothetical protein
GL50803_22547	7	High cysteine membrane protein Group 2
GL50803_14800	68	Protein 21.1
GL50803_8903	567	Copine I
GL50803_102142	254	hypothetical protein
GL50803_102141	89	unspecified product
GL50803_22553	14	Encystation-specific protease
GL50803_8855	30	P115, putative
GL50803_8856	2	Kinase, NEK
GL50803_28651	464	Dipeptidyl-peptidase I precursor
GL50803_8860	204	Kinase, NEK
GL50803_14790	9	hypothetical protein
GL50803_16678	10	hypothetical protein
GL50803_16679	124	hypothetical protein
GL50803_8865	725	hypothetical protein
GL50803_5462	344	Delta tubulin
GL50803_13930	15	ARF3
GL50803_13926	30	Nucleolar protein family A, member 2
GL50803_5455	140	unspecified product
GL50803_32134	1162	hypothetical protein
GL50803_17176	3	hypothetical protein
GL50803_13838	811	hypothetical protein
GL50803_5116	297	hypothetical protein
GL50803_27364	7	hypothetical protein
GL50803_13836	15	hypothetical protein
GL50803_5981	396	hypothetical protein
GL50803_103878	180	hypothetical protein
GL50803_87298	321	unspecified product
GL50803_2661	33	Cyclin-dependent kinases regulatory subunit
GL50803_35086	2633	unspecified product
GL50803_22573	40	hypothetical protein
GL50803_112208	24	VSP with INR
GL50803_8528	18	hypothetical protein
GL50803_112210	196	hypothetical protein
GL50803_17347	6	hypothetical protein
GL50803_13528	300	Sec1 vATPase
GL50803_94150	41	hypothetical protein
GL50803_4064	88	hypothetical protein
GL50803_4063	32	Nuclear LIM interactor-interacting factor 1
GL50803_37518	215	hypothetical protein
GL50803_94143	54	hypothetical protein
GL50803_5947	7	Ribosomal protein L35a
GL50803_5942	52	Polyadenylate-binding protein, putative
GL50803_5939	108	hypothetical protein
GL50803_13133	24	hypothetical protein
GL50803_94117	30	hypothetical protein
GL50803_17340	711	hypothetical protein
GL50803_94108	171	unspecified product
GL50803_37488	11	hypothetical protein
GL50803_37486	639	unspecified product
GL50803_14168	41	Amino acid transporter system N2, putative
GL50803_23424	7	hypothetical protein
GL50803_3993	162	Polyadenylate-binding protein, putative
GL50803_17336	9	hypothetical protein
GL50803_3994	64	Ubiquitin fusion degradation protein 1
GL50803_17335	67	Kinase, CMGC SRPK
GL50803_3997	465	hypothetical protein
GL50803_4657	26	hypothetical protein
GL50803_20529	192	unspecified product
GL50803_17333	611	Kinesin-2
GL50803_4653	20	Serpin 1
GL50803_4652	31	Ribosomal protein S16
GL50803_103205	33	hypothetical protein
GL50803_10181	17	hypothetical protein
GL50803_87261	10	hypothetical protein
GL50803_10192	8	hypothetical protein
GL50803_17329	106	hypothetical protein
GL50803_17327	34	Xaa-Pro dipeptidase
GL50803_17325	18	Pumilio-family RNA-binding protein, putative
GL50803_112258	72	hypothetical protein
GL50803_15247	44	Grp94/Hsp90
GL50803_10572	59	hypothetical protein
GL50803_10573	932	Protein 21.1
GL50803_10570	19	FKBP-type peptidyl-prolyl cis-trans isomerase
GL50803_10569	31	hypothetical protein
GL50803_10568	53	hypothetical protein
GL50803_32203	70	unspecified product
GL50803_14560	1637	hypothetical protein
GL50803_87202	233	Protein F54C1.5
GL50803_7825	69	hypothetical protein
GL50803_7831	2280	hypothetical protein
GL50803_9861	18	hypothetical protein
GL50803_15067	61	hypothetical protein
GL50803_37962	898	hypothetical protein
GL50803_17266	178	hypothetical protein
GL50803_17265	9	Dynein heavy chain
GL50803_9848	15	Dynein light chain
GL50803_15063	248	Long chain fatty acid CoA ligase 5
GL50803_32192	417	unspecified product
GL50803_15062	80	hypothetical protein
GL50803_104139	109	hypothetical protein
GL50803_17261	62	hypothetical protein
GL50803_23897	404	hypothetical protein
GL50803_14633	9	hypothetical protein
GL50803_3599	293	hypothetical protein
GL50803_3598	8	hypothetical protein
GL50803_16435	95	Protein 21.1
GL50803_28232	7	hypothetical protein
GL50803_7512	126	Protein tyrosine phosphatase-like protein
GL50803_7513	231	hypothetical protein
GL50803_7511	145	HAM1 protein
GL50803_113625	836	hypothetical protein
GL50803_14469	66	Synaptobrevin-like protein
GL50803_16433	52	Amino acid permease, putative
GL50803_113622	74	Protein 21.1
GL50803_15144	10	RNA polymerase II subunit Rpb8
GL50803_10219	36	Protein 21.1
GL50803_10217	59	Cathepsin B precursor
GL50803_16930	1322	hypothetical protein
GL50803_8382	8	Short-chain dehydrogenase, putative
GL50803_93463	89	hypothetical protein
GL50803_37595	475	hypothetical protein
GL50803_8377	14	hypothetical protein
GL50803_14054	440	hypothetical protein
GL50803_5883	52	hypothetical protein
GL50803_16926	65	hypothetical protein
GL50803_5891	120	unspecified product
GL50803_5890	99	hypothetical protein
GL50803_14058	53	CAMP-specific 3,5-cyclic phosphodiesterase 4B
GL50803_113603	12	ELKS
GL50803_13651	29	hypothetical protein
GL50803_14960	9	hypothetical protein
GL50803_9478	4	Alpha mitochondrial protein peptidase like protein
GL50803_9481	34	Dynein-like protein
GL50803_16240	129	hypothetical protein
GL50803_9483	17	hypothetical protein
GL50803_9485	23	hypothetical protein
GL50803_94287	531	hypothetical protein
GL50803_4577	61	hypothetical protein
GL50803_24485	10	hypothetical protein
GL50803_27141	70	hypothetical protein
GL50803_15955	28	DNA-directed RNA polymerase II RPB6
GL50803_16070	26	hypothetical protein
GL50803_2342	450	hypothetical protein
GL50803_2341	52	hypothetical protein
GL50803_16069	67	Phosphoacetylglucosamine mutase
GL50803_16068	433	hypothetical protein
GL50803_16067	172	hypothetical protein
GL50803_5927	397	hypothetical protein
GL50803_94322	101	Spastin
GL50803_27027	8	hypothetical protein
GL50803_33932	31	hypothetical protein
GL50803_15551	11	Ribosomal protein S18
GL50803_11992	33	TCP-1 chaperonin subunit epsilon
GL50803_89285	633	hypothetical protein
GL50803_11990	37	hypothetical protein
GL50803_15549	11	Dynein binding protein, putative
GL50803_11984	101	hypothetical protein
GL50803_11982	37	hypothetical protein
GL50803_16761	12	hypothetical protein
GL50803_16760	67	Phenylalanyl-tRNA synthetase beta chain
GL50803_13561	14	Translation elongation factor
GL50803_4204	50	MutT/nudix family protein
GL50803_89315	36	VSP
GL50803_32778	39	Protein 21.1
GL50803_5665	95	Ubiquitin/ribosomal protein CEP52
GL50803_18633	247	unspecified product
GL50803_14004	7	Long-flagella protein, kinase, CMGC RCK
GL50803_32775	215	hypothetical protein
GL50803_5657	246	hypothetical protein
GL50803_16722	38	Xaa-Pro dipeptidase
GL50803_7413	24	hypothetical protein
GL50803_7414	11	Protein 21.1
GL50803_14451	424	ATP-dependent RNA helicase
GL50803_6000	699	Amino acid transporter family
GL50803_112885	9	Adenine phosphoribosyltransferase
GL50803_31790	900	hypothetical protein
GL50803_14083	23	hypothetical protein
GL50803_12875	120	hypothetical protein
GL50803_2010	20	hypothetical protein
GL50803_2012	120	hypothetical protein
GL50803_2011	229	hypothetical protein
GL50803_2014	36	hypothetical protein
GL50803_2013	335	Glutaredoxin-related protein
GL50803_32800	367	hypothetical protein
GL50803_16833	34	Tenascin-like
GL50803_2101	58	Cytidine deaminase
GL50803_10840	11	DNA-directed RNA polymerases I and III 16 kDa polypeptide
GL50803_29327	116	hypothetical protein
GL50803_10846	179	hypothetical protein
GL50803_15306	512	Protein 21.1
GL50803_10857	12	Small nuclear ribonucleoprotein B, putative
GL50803_10856	17	Alpha-snap
GL50803_15307	12	Nitroreductase family protein
GL50803_16835	629	CDC5-like protein
GL50803_14400	24	hypothetical protein
GL50803_91643	25	26S proteasome regulatory subunit, putative
GL50803_21750	56	Ribose-phosphate pyrophosphokinase
GL50803_15219	35	hypothetical protein
GL50803_10460	48	hypothetical protein
GL50803_10459	163	CGI-35 protein, putative
GL50803_15218	101	WD-40 repeat protein
GL50803_15216	2061	hypothetical protein
GL50803_10450	38	FKBP-type peptidyl-prolyl cis-trans isomerase
GL50803_10452	217	hypothetical protein
GL50803_15215	61	Phosphatase
GL50803_10444	947	hypothetical protein
GL50803_15213	168	hypothetical protein
GL50803_16636	52	Rab2b
GL50803_32786	847	Coiled-coil protein
GL50803_16637	187	hypothetical protein
GL50803_16639	396	Histone acetyltransferase Elp3
GL50803_16640	105	hypothetical protein
GL50803_13467	122	hypothetical protein
GL50803_3855	349	hypothetical protein
GL50803_113165	117	hypothetical protein
GL50803_7343	1063	hypothetical protein
GL50803_90434	176	hypothetical protein
GL50803_13315	1225	hypothetical protein
GL50803_13316	1	hypothetical protein
GL50803_5921	85	Ubiquitin-conjugating enzyme E2-28.4 kDa
GL50803_5919	286	Cation efflux family protein
GL50803_14064	42	hypothetical protein
GL50803_27658	656	hypothetical protein
GL50803_20781	589	hypothetical protein
GL50803_27655	797	hypothetical protein
GL50803_10822	58	WD-40 repeat protein family
GL50803_15296	184	hypothetical protein
GL50803_15297	6	Ribokinase
GL50803_10829	9	Glucosamine-6-phosphate deaminase
GL50803_10832	933	hypothetical protein
GL50803_90425	92	hypothetical protein
GL50803_113143	57	Lipopolysaccharide-responsive and beige-like anchor protein
GL50803_10836	212	hypothetical protein
GL50803_17507	19	hypothetical protein
GL50803_10255	38	Translation initiation factor eIF-4A, putative
GL50803_10256	869	hypothetical protein
GL50803_113137	5	hypothetical protein
GL50803_15154	300	hypothetical protein
GL50803_29119	228	hypothetical protein
GL50803_113133	52	hypothetical protein
GL50803_17508	314	Coiled-coil protein
GL50803_15156	8	SRP GTPase
GL50803_10269	1401	hypothetical protein
GL50803_113130	11	hypothetical protein
GL50803_6579	258	hypothetical protein
GL50803_20802	10	Zinc finger domain protein
GL50803_6583	8	hypothetical protein
GL50803_7747	726	hypothetical protein
GL50803_22806	43	hypothetical protein
GL50803_7751	11	hypothetical protein
GL50803_22808	20	Histidyl-tRNA synthetase
GL50803_17515	183	hypothetical protein
GL50803_8250	33	hypothetical protein
GL50803_14670	20	Protein disulfide isomerase PDI3
GL50803_33230	223	hypothetical protein
GL50803_8245	35	Glucosamine-6-phosphate deaminase
GL50803_8242	124	Ribosome biogenesis protein Nop10
GL50803_8243	70	hypothetical protein
GL50803_8241	274	HRT1-like protein
GL50803_8235	14	Protein 21.1
GL50803_17516	11	Cathepsin B precursor
GL50803_8228	50	DNA-dependent ATPase, putative
GL50803_8227	72	ATP-binding cassette protein 5
GL50803_87677	197	Kinase, NEK
GL50803_8064	9	Protein disulfide isomerase PDI5
GL50803_14621	15	hypothetical protein
GL50803_8055	69	hypothetical protein
GL50803_14620	9	Ribosomal protein S6
GL50803_8049	9	hypothetical protein
GL50803_8048	36	hypothetical protein
GL50803_17520	5	ClpB protein
GL50803_26364	29	hypothetical protein
GL50803_2483	54	Kinase, NEK
GL50803_38901	36	VSP
GL50803_101589	34	High cysteine protein
GL50803_103059	20	Dynein heavy chain
GL50803_27190	889	hypothetical protein
GL50803_14827	22	Ribosomal protein S11
GL50803_22394	20	hypothetical protein
GL50803_8987	58	hypothetical protein
GL50803_5604	42	hypothetical protein
GL50803_5603	56	Coatomer gamma subunit
GL50803_112312	22	Elongation factor 1-alpha
GL50803_9134	170	hypothetical protein
GL50803_8329	153	hypothetical protein
GL50803_16430	37	hypothetical protein
GL50803_16429	68	hypothetical protein
GL50803_14680	212	hypothetical protein
GL50803_11402	539	unspecified product
GL50803_16425	980	Kinesin-5
GL50803_16424	49	hypothetical protein
GL50803_11397	46	TCP-1 chaperonin subunit beta
GL50803_15409	26	Kinase, NEK
GL50803_11390	16	Kinase, NEK
GL50803_11380	94	hypothetical protein
GL50803_36282	234	unspecified product
GL50803_24453	51	hypothetical protein
GL50803_7261	120	Phosphatidylinositol-4-phosphate 5-kinase, putative
GL50803_24446	426	hypothetical protein
GL50803_7259	122	CDP-diacylglycerol-glycerol-3-phosphate 3-phosphatidyltransferase
GL50803_14404	53	Phosphatase
GL50803_90872	32	Phosphoglycerate kinase
GL50803_16707	44	Clusterin associated protein 1, putative
GL50803_11486	13	20S proteasome alpha subunit 7
GL50803_11487	28	hypothetical protein
GL50803_16708	1216	hypothetical protein
GL50803_11488	136	hypothetical protein
GL50803_11495	25	Rab GDI
GL50803_11497	101	hypothetical protein
GL50803_11499	28	Protein 21.1
GL50803_16709	46	WD-repeat membrane protein
GL50803_26049	177	unspecified product
GL50803_101918	10	hypothetical protein
GL50803_4873	146	hypothetical protein
GL50803_114199	70	hypothetical protein
GL50803_114201	294	hypothetical protein
GL50803_14752	1630	hypothetical protein
GL50803_14748	110	hypothetical protein
GL50803_32029	861	unspecified product
GL50803_17036	584	hypothetical protein
GL50803_103888	884	hypothetical protein
GL50803_17037	22	hypothetical protein
GL50803_27266	72	[2Fe-2S] ferredoxin
GL50803_4197	8	Phosphatidylinositol transfer protein alpha isoform
GL50803_4192	356	ARL2
GL50803_101832	86	High cysteine protein
GL50803_16200	197	Developmentally regulated GTP-binding protein 1
GL50803_114216	52	hypothetical protein
GL50803_38050	770	unspecified product
GL50803_13694	95	hypothetical protein
GL50803_114218	33	Gamma tubulin
GL50803_10978	594	hypothetical protein
GL50803_16642	503	hypothetical protein
GL50803_95290	83	hypothetical protein
GL50803_24662	21	L-serine dehydratase
GL50803_31113	983	hypothetical protein
GL50803_4337	27	hypothetical protein
GL50803_13603	45	hypothetical protein
GL50803_8524	71	Transitional endoplasmic reticulum ATPase
GL50803_28549	54	hypothetical protein
GL50803_16457	54	hypothetical protein
GL50803_8511	958	hypothetical protein
GL50803_8512	118	Spindle pole protein, putative
GL50803_8508	742	Basal body protein
GL50803_95254	1707	hypothetical protein
GL50803_3146	103	hypothetical protein
GL50803_16453	49	Carbamate kinase
GL50803_3147	15	Protein 21.1
GL50803_113416	1233	High cysteine membrane protein TMK-like
GL50803_113415	53	hypothetical protein
GL50803_87056	410	hypothetical protein
GL50803_12921	963	hypothetical protein
GL50803_87058	7	Vacuolar ATP synthase subunit C
GL50803_16877	154	Zinc finger domain protein
GL50803_8937	32	hypothetical protein
GL50803_8944	308	hypothetical protein
GL50803_8949	297	Protein 21.1
GL50803_16880	2313	Multidrug resistance protein B
GL50803_40747	11	hypothetical protein
GL50803_14737	165	hypothetical protein
GL50803_8586	9	hypothetical protein
GL50803_8587	27	Kinase, AGC NDR
GL50803_8589	100	Suppressor of actin 1
GL50803_8592	88	Tubulin tyrosine ligase
GL50803_19938	93	unspecified product
GL50803_13844	1712	hypothetical protein
GL50803_89050	23	hypothetical protein
GL50803_113439	26	VSP with INR
GL50803_10813	8	hypothetical protein
GL50803_10810	101	hypothetical protein
GL50803_10808	70	hypothetical protein
GL50803_15289	48	hypothetical protein
GL50803_22478	243	hypothetical protein
GL50803_10802	2557	hypothetical protein
GL50803_17296	12	hypothetical protein
GL50803_113450	22	VSP with INR
GL50803_17298	29	hypothetical protein
GL50803_17299	130	Kinase, NEK-like
GL50803_35341	24	hypothetical protein
GL50803_3951	121	hypothetical protein
GL50803_26915	408	hypothetical protein
GL50803_2750	19	hypothetical protein
GL50803_2754	77	hypothetical protein
GL50803_92246	23	Cation-transporting ATPase 2, putative
GL50803_14997	23	hypothetical protein
GL50803_14999	811	hypothetical protein
GL50803_9611	37	hypothetical protein
GL50803_15000	52	TFIIH P44
GL50803_92223	472	ABC transporter family protein
GL50803_9620	36	High cysteine membrane protein Group 2
GL50803_17305	16	Multidrug resistance protein B
GL50803_5567	48	hypothetical protein
GL50803_5568	9	hypothetical protein
GL50803_15954	12	hypothetical protein
GL50803_15953	11	Kinase, NEK
GL50803_23004	10	hypothetical protein
GL50803_101594	34	CCAAT-box-binding transcription factor
GL50803_8789	31	hypothetical protein
GL50803_8792	232	hypothetical protein
GL50803_34591	65	hypothetical protein
GL50803_8794	9	Nucleolar GAR1-like protein, putative
GL50803_8799	21	hypothetical protein
GL50803_87774	50	hypothetical protein
GL50803_8804	13	hypothetical protein
GL50803_8803	853	Protein 21.1
GL50803_8805	19	Kinase, SCY1
GL50803_23017	49	hypothetical protein
GL50803_6248	95	hypothetical protein
GL50803_16273	12	hypothetical protein
GL50803_16272	10	Kinase, NEK
GL50803_6254	535	hypothetical protein
GL50803_87817	10	Tubby superfamily protein
GL50803_16269	18	FAD synthetase
GL50803_31711	1691	unspecified product
GL50803_16606	187	hypothetical protein
GL50803_16605	459	ABC transporter family protein
GL50803_5806	999	Protein 21.1
GL50803_9834	615	Endonuclease/Exonuclease/phosphatase
GL50803_9829	35	CDP-diacylglycerol-inositol 3-phosphatidyltransferase
GL50803_9825	32	TBP-interacting protein TIP49
GL50803_9823	8	hypothetical protein
GL50803_21365	620	hypothetical protein
GL50803_21366	67	Kinase, NEK
GL50803_21367	419	hypothetical protein
GL50803_18470	14	Vacuolar proton-ATPase subunit, putative
GL50803_15930	90	RNA helicase, putative
GL50803_114336	2531	hypothetical protein
GL50803_37449	97	hypothetical protein
GL50803_26435	1233	hypothetical protein
GL50803_7962	148	20S proteasome alpha subunit 6
GL50803_7966	110	hypothetical protein
GL50803_37452	39	hypothetical protein
GL50803_91451	1157	Kinase, NEK
GL50803_16894	44	hypothetical protein
GL50803_2098	87	ATP-dependent RNA helicase p54, putative
GL50803_22451	18	Kinase, NEK
GL50803_22454	10	ARF GAP
GL50803_22455	57	hypothetical protein
GL50803_4245	37	hypothetical protein
GL50803_4246	861	PRIP-interacting protein PIPMT
GL50803_3331	47	Malate dehydrogenase
GL50803_16350	11	hypothetical protein
GL50803_33218	36	Dynein intermediate chain
GL50803_17396	126	hypothetical protein
GL50803_12598	38	KRR1
GL50803_17395	10	Ribosomal protein L5
GL50803_11712	9	hypothetical protein
GL50803_11713	9	Prefoldin subunit 2
GL50803_11714	16	hypothetical protein
GL50803_11715	24	hypothetical protein
GL50803_15483	97	hypothetical protein
GL50803_115054	1250	Protein 21.1
GL50803_15487	15	WD-40 repeat protein
GL50803_17393	10	hypothetical protein
GL50803_115047	23	VSP
GL50803_17392	130	Kinase
GL50803_17391	28	Maebl, putative
GL50803_7664	59	hypothetical protein
GL50803_7663	43	hypothetical protein
GL50803_7662	29	RNase L inhibitor
GL50803_6336	40	Epsilon tubulin
GL50803_6334	18	hypothetical protein
GL50803_6330	20	hypothetical protein
GL50803_14174	50	Glutamate-rich WD-repeat protein
GL50803_14171	9	Ribosomal protein L37
GL50803_17388	11	hypothetical protein
GL50803_6885	62	hypothetical protein
GL50803_6886	21	hypothetical protein
GL50803_6888	10	hypothetical protein
GL50803_14310	116	hypothetical protein
GL50803_33281	43	hypothetical protein
GL50803_6896	126	hypothetical protein
GL50803_6897	629	hypothetical protein
GL50803_17385	12	hypothetical protein
GL50803_96141	540	unspecified product
GL50803_5672	74	hypothetical protein
GL50803_6508	15	hypothetical protein
GL50803_89622	325	Mu adaptin
GL50803_6519	1564	hypothetical protein
GL50803_9099	10	hypothetical protein
GL50803_9098	66	hypothetical protein
GL50803_16256	54	hypothetical protein
GL50803_14863	11	hypothetical protein
GL50803_9090	1115	hypothetical protein
GL50803_9089	36	Cytochrome B5, outer mitochondrial membrane
GL50803_103838	322	Kinase, ULK
GL50803_14861	2208	hypothetical protein
GL50803_10679	180	hypothetical protein
GL50803_29277	14	hypothetical protein
GL50803_89552	110	hypothetical protein
GL50803_3977	20	G2/mitotic-specific cyclin B
GL50803_16602	8	hypothetical protein
GL50803_16966	149	hypothetical protein
GL50803_36698	477	unspecified product
GL50803_14434	13	Protein 21.1
GL50803_103855	38	Vacuolar protein sorting 29
GL50803_14436	8	Kinase, STE STE20
GL50803_25035	48	Protein tyrosine phosphatase
GL50803_8004	73	hypothetical protein
GL50803_8002	24	hypothetical protein
GL50803_8001	28	Ribosomal protein L15
GL50803_101534	11	Kinase, NEK
GL50803_8394	29	hypothetical protein
GL50803_14694	242	hypothetical protein
GL50803_8388	904	hypothetical protein
GL50803_28514	118	hypothetical protein
GL50803_23185	104	hypothetical protein, similar to SMC2
GL50803_15097	18	Alpha-14 giardin
GL50803_114609	17	Pyruvate-flavodoxin oxidoreductase
GL50803_29630	642	hypothetical protein
GL50803_23800	10	hypothetical protein
GL50803_104866	34	GTL3 aka MD0260
GL50803_137730	163	Kinase
GL50803_11749	71	hypothetical protein
GL50803_22587	52	hypothetical protein
GL50803_11755	46	hypothetical protein
GL50803_15496	1137	hypothetical protein
GL50803_15497	96	hypothetical protein
GL50803_11763	142	hypothetical protein
GL50803_15499	29	hypothetical protein
GL50803_17412	21	hypothetical protein
GL50803_34838	345	hypothetical protein
GL50803_15501	21	CDC50
GL50803_17411	10	TCP-1 chaperonin subunit gamma
GL50803_137729	28	VSP
GL50803_17408	60	hypothetical protein
GL50803_14485	582	Protein 21.1
GL50803_7566	114	hypothetical protein
GL50803_7569	89	GTP-binding protein Sar1
GL50803_114974	550	hypothetical protein
GL50803_7573	79	3-hydroxy-3-methylglutaryl-coenzyme A reductase
GL50803_105907	97	unspecified product
GL50803_3036	100	RNA polymerase II subunit Rpb11
GL50803_32312	15	Protein phosphatase 2C
GL50803_3032	53	Tryptophanyl-tRNA synthetase
GL50803_13227	33	hypothetical protein
GL50803_17406	27	Phosphoinositide-3-kinase, class 3
GL50803_17404	241	hypothetical protein
GL50803_15404	411	hypothetical protein
GL50803_11342	35	hypothetical protein
GL50803_32311	16	unspecified product
GL50803_17403	21	hypothetical protein
GL50803_17402	47	Protein 21.1
GL50803_17400	115	hypothetical protein
GL50803_11321	83	hypothetical protein
GL50803_15397	129	Kinase, CMGC CDK
GL50803_11319	185	U3 small nucleolar ribonucleoprotein protein IMP3, putative
GL50803_91761	431	Sec1, putative
GL50803_13268	17	hypothetical protein
GL50803_3169	42	Cathepsin L precursor
GL50803_15871	30	Serine peptidase, putative
GL50803_14938	9	Ribosomal protein L12
GL50803_9376	21	Sec23
GL50803_31295	683	DinF protein
GL50803_9382	306	Prenyltransferase
GL50803_7126	37	hypothetical protein
GL50803_40817	10	Actin related protein
GL50803_102061	180	hypothetical protein
GL50803_17082	308	Rab geranylgeranyltransferase
GL50803_17083	30	hypothetical protein
GL50803_34850	32	hypothetical protein
GL50803_24068	110	UBC3
GL50803_2933	242	Programmed cell death protein-like protein
GL50803_96670	49	Potassium-transporting ATPase alpha chain 1
GL50803_16215	89	hypothetical protein
GL50803_16214	113	MCM3
GL50803_14086	283	hypothetical protein
GL50803_6007	43	Protein 21.1
GL50803_8850	81	Protein 21.1
GL50803_8843	1643	Ubiquitin
GL50803_8842	50	ZPR1
GL50803_96818	23	hypothetical protein
GL50803_102963	9	tRNA 2-methylthioadenosine synthase
GL50803_24372	326	ENC6 protein
GL50803_9503	65	hypothetical protein
GL50803_9505	215	hypothetical protein
GL50803_9506	423	hypothetical protein
GL50803_16328	31	DRAP deaminase
GL50803_31484	886	hypothetical protein
GL50803_9520	156	hypothetical protein
GL50803_14972	325	hypothetical protein
GL50803_36817	36	hypothetical protein
GL50803_24376	11	DNA helicase HCS1
GL50803_9068	167	hypothetical protein
GL50803_16615	99	hypothetical protein
GL50803_16612	92	Tyrosyl-tRNA synthetase
GL50803_9060	10	hypothetical protein
GL50803_113677	42	Coiled-coil protein
GL50803_7009	17	Adenylate kinase
GL50803_7007	40	hypothetical protein
GL50803_11654	20	Alpha-1 giardin
GL50803_15464	1182	hypothetical protein
GL50803_11647	25	hypothetical protein
GL50803_11640	99	hypothetical protein
GL50803_11638	90	Topoisomerase I-related protein
GL50803_15460	180	Dynein-like protein
GL50803_38104	38	Phospholipid-transporting ATPase IIB, putative
GL50803_1076	32	Alpha-13 giardin
GL50803_16332	832	Coiled-coil protein
GL50803_33023	74	hypothetical protein
GL50803_15995	62	Nucleotide-binding head-stalk protein, putative
GL50803_13851	750	hypothetical protein
GL50803_5161	36	Sec20, putative
GL50803_14553	10	CCAAT-binding transcription factor subunit C
GL50803_7807	64	WD-40 repeat protein
GL50803_14552	35	hypothetical protein
GL50803_14551	34	Alpha-6 giardin
GL50803_7796	47	Alpha-2 giardin
GL50803_16543	201	hypothetical protein
GL50803_15972	333	Protein 21.1
GL50803_13832	62	D-tyrosyl-tRNA deacylase
GL50803_16122	62	Kinase, NEK
GL50803_93011	30	Protein 21.1
GL50803_5881	111	Protein 21.1
GL50803_5879	567	Protein 21.1
GL50803_93002	80	hypothetical protein
GL50803_28699	19	hypothetical protein
GL50803_30233	359	hypothetical protein
GL50803_3861	30	Alcohol dehydrogenase 3 lateral transfer candidate
GL50803_31234	521	unspecified product
GL50803_21662	5	Coiled-coil protein
GL50803_95639	9	hypothetical protein
GL50803_101339	75	FKBP-type peptidyl-prolyl cis-trans isomerase
GL50803_16902	11	hypothetical protein
GL50803_95878	113	hypothetical protein
GL50803_95876	701	unspecified product
GL50803_27520	128	Kinase, CMGC CK2
GL50803_5543	776	hypothetical protein
GL50803_27521	24	Histone H2A
GL50803_13354	187	hypothetical protein
GL50803_95898	21	ATP-dependent RNA helicase
GL50803_7328	225	hypothetical protein
GL50803_21628	34	hypothetical protein
GL50803_114885	1092	Kinesin-associated protein
GL50803_95918	620	E3 ubiquitin ligase for Rad6p required for the ubiquitination of histone H2B
GL50803_7533	5	Angio-associated migratory cell protein
GL50803_7532	22	Vacuolar ATP synthase catalytic subunit A
GL50803_28234	10	Adenylate kinase
GL50803_13601	35	hypothetical protein
GL50803_22139	1176	hypothetical protein
GL50803_86440	32	Peptidyl-tRNA hydrolase
GL50803_22136	29	hypothetical protein
GL50803_1721	190	TATA-binding protein-like factor
GL50803_137754	11	hypothetical protein
GL50803_2053	62	Serine/threonine protein phosphatase 4
GL50803_40244	60	P24, putative
GL50803_103783	12	Protein 21.1
GL50803_41369	76	Protein 21.1
GL50803_16390	72	hypothetical protein
GL50803_9704	64	Transketolase
GL50803_9703	25	hypothetical protein
GL50803_114462	32	Axonemal p66.0
GL50803_9698	296	Riboflavin kinase, FMN adenylyltransferase
GL50803_22084	519	DGTP triphosphohydrolase
GL50803_32938	124	hypothetical protein
GL50803_13590	12	Protein 21.1
GL50803_31144	867	hypothetical protein
GL50803_137641	42	TMP55
GL50803_5554	10	Kinase, NEK-frag
GL50803_5553	343	Kinase, NEK
GL50803_3367	47	Histone H3
GL50803_3370	915	Hypothetical protein
GL50803_101380	23	VSP
GL50803_8217	55	Uridine kinase
GL50803_8218	35	Kinase, NEK
GL50803_41288	40	Mucin-like protein
GL50803_16288	0	hypothetical protein
GL50803_14135	134	Nucleoside diphosphate kinase
GL50803_6197	101	unspecified product
GL50803_14133	49	Protein 21.1
GL50803_6185	23	hypothetical protein
GL50803_6184	10	Branched-chain amino acid aminotransferase lateral transfer candidate
GL50803_39717	439	hypothetical protein
GL50803_16286	642	Lecithin-cholesterol acyl transferase, putative
GL50803_113553	31	Kinase, NEK
GL50803_113554	318	26S proteasome ATPase subunit S4, putative
GL50803_3095	126	hypothetical protein
GL50803_3098	16	hypothetical protein
GL50803_17230	29	Gamma giardin
GL50803_17232	143	hypothetical protein
GL50803_39726	732	hypothetical protein
GL50803_8200	428	hypothetical protein
GL50803_8195	23	hypothetical protein
GL50803_14661	61	Kinase, CAMK CAMKL
GL50803_20413	249	hypothetical protein
GL50803_14660	21	hypothetical protein
GL50803_8189	53	Ubiquitin carboxyl-terminal hydrolase 14
GL50803_90024	10	hypothetical protein
GL50803_17236	36	hypothetical protein
GL50803_2198	33	Serine/threonine protein phosphatase 5
GL50803_26269	348	unspecified product
GL50803_2267	11	hypothetical protein
GL50803_17238	760	hypothetical protein
GL50803_9004	42	hypothetical protein
GL50803_9008	21	Aldose reductase
GL50803_14834	150	Protein 21.1
GL50803_9011	9	Glycyl-tRNA synthetase
GL50803_17241	84	hypothetical protein
GL50803_14835	41	Kinase, NEK
GL50803_28696	2204	hypothetical protein
GL50803_17242	2213	hypothetical protein
GL50803_4039	36	Leucine-rich repeat protein
GL50803_3042	52	Hybrid cluster protein lateral transfer candidate
GL50803_17246	469	hypothetical protein
GL50803_24009	126	Protein 21.1
GL50803_4912	17	Kinase, NEK
GL50803_13766	149	Protein 21.1
GL50803_4911	293	hypothetical protein
GL50803_13671	928	hypothetical protein
GL50803_17627	17	hypothetical protein
GL50803_13981	36	Kinase, NEK
GL50803_5613	9	hypothetical protein
GL50803_17626	34	hypothetical protein
GL50803_3290	1144	Protein 21.1
GL50803_17625	17	Kinase, CMGC GSK
GL50803_3291	9	hypothetical protein
GL50803_3294	26	hypothetical protein
GL50803_17622	112	Kinase, NEK
GL50803_12147	792	hypothetical protein
GL50803_12148	10	Kinase, NEK
GL50803_29772	50	hypothetical protein
GL50803_12150	40	Alanine aminotransferase, putative
GL50803_15589	25	hypothetical protein
GL50803_12152	64	Kinase, NEK
GL50803_32506	219	unspecified product
GL50803_26589	184	hypothetical protein
GL50803_42285	768	Ciliary dynein heavy chain 11
GL50803_6372	17	High cysteine protein
GL50803_14182	297	hypothetical protein
GL50803_6367	53	hypothetical protein
GL50803_6365	61	hypothetical protein
GL50803_113655	1517	hypothetical protein
GL50803_31970	369	unspecified product
GL50803_14375	20	Asparaginyl-tRNA synthetase
GL50803_7139	70	hypothetical protein
GL50803_14373	62	Dynamin
GL50803_7134	31	hypothetical protein
GL50803_113662	740	hypothetical protein
GL50803_16957	9	WD-40 repeat protein family
GL50803_16956	64	hypothetical protein
GL50803_11078	102	unspecified product
GL50803_11054	120	hypothetical protein
GL50803_11055	515	hypothetical protein
GL50803_11052	4345	Zinc finger domain protein
GL50803_113522	1185	Kinase, AGC MAST
GL50803_14713	469	IFT complex B
GL50803_17617	294	hypothetical protein
GL50803_4343	199	Zinc finger domain protein
GL50803_91056	24	Aspartate aminotransferase, cytoplasmic
GL50803_4344	67	hypothetical protein
GL50803_4349	29	Endothelin-converting enzyme 2
GL50803_137740	38	VSP
GL50803_88082	79	Coatomer beta subunit
GL50803_10623	28	Phosphoenolpyruvate carboxykinase
GL50803_15256	188	Undecaprenyl pyrophosphate synthase
GL50803_6340	136	hypothetical protein
GL50803_6344	43	Protein 21.1
GL50803_32493	617	unspecified product
GL50803_88059	48	hypothetical protein
GL50803_34906	18	hypothetical protein
GL50803_88071	243	Protein 21.1
GL50803_8978	31	4-alpha-glucanotransferase
GL50803_6590	52	RNA 3'-terminal phosphate cyclase-like protein
GL50803_6592	134	hypothetical protein
GL50803_14247	53	TM efflux prot
GL50803_17608	205	Protein 21.1
GL50803_5845	10	Ribosomal protein S8
GL50803_5842	190	hypothetical protein
GL50803_32483	359	unspecified product
GL50803_6306	316	hypothetical protein
GL50803_102921	9	hypothetical protein
GL50803_6304	80	Fe-hydrogenase-1
GL50803_23314	28	Protein 21.1
GL50803_15427	25	Giardia trophozoite antigen GTA-2
GL50803_11540	25	Hexose transporter
GL50803_15429	441	Glutathione synthetase, putative
GL50803_16802	33	Kinase, CMGC CDK
GL50803_11551	32	hypothetical protein
GL50803_104982	226	hypothetical protein
GL50803_23300	519	hypothetical protein
GL50803_15436	303	hypothetical protein
GL50803_137744	34	VSP
GL50803_1979	44	hypothetical protein
GL50803_16945	23	Kinesin-13
GL50803_40863	701	hypothetical protein
GL50803_10341	36	hypothetical protein
GL50803_20025	72	unspecified product
GL50803_10330	13	Tenascin precursor
GL50803_96994	245	Syntaxin 1A
GL50803_10329	558	Ferredoxin Fd3
GL50803_29147	171	hypothetical protein
GL50803_112368	1528	hypothetical protein
GL50803_20020	11	hypothetical protein
GL50803_10316	33	hypothetical protein
GL50803_16940	103	hypothetical protein
GL50803_10315	90	hypothetical protein
GL50803_10311	34	Ornithine carbamoyltransferase
GL50803_137745	32	SMC3-like protein
GL50803_4838	25	Translation initiation factor eIF-2B delta subunit
GL50803_5786	65	Ribosome biogenesis protein NEP1, putative
GL50803_5784	745	hypothetical protein
GL50803_5785	22	hypothetical protein
GL50803_16935	11	hypothetical protein
GL50803_5779	31	hypothetical protein
GL50803_14030	790	hypothetical protein
GL50803_95693	165	hypothetical protein
GL50803_112348	6	hypothetical protein
GL50803_13346	1138	Dmc1b
GL50803_17190	21	Eukaryotic peptide chain release factor subunit 1
GL50803_32143	1060	hypothetical protein
GL50803_15522	16	hypothetical protein
GL50803_101450	11	Protein 21.1
GL50803_11895	451	hypothetical protein
GL50803_24985	557	hypothetical protein
GL50803_11884	139	hypothetical protein
GL50803_137747	36	hypothetical protein
GL50803_15514	9	Kinase, STE STE20
GL50803_15513	953	WD-repeat protein BING4
GL50803_8604	616	hypothetical protein
GL50803_24979	489	hypothetical protein
GL50803_14742	9	Kinase, NEK
GL50803_137748	40	hypothetical protein
GL50803_87926	9	hypothetical protein
GL50803_40904	808	Kinase, NEK
GL50803_11044	26	Mob1-like protein
GL50803_11043	30	Fructose-bisphosphate aldolase
GL50803_15331	19	hypothetical protein
GL50803_11040	84	Kinase, NEK
GL50803_11039	24	Actin related protein
GL50803_11034	43	hypothetical protein
GL50803_19318	40	unspecified product
GL50803_22268	10	hypothetical protein
GL50803_101501	30	Seryl-tRNA synthetase
GL50803_15090	10	L-serine dehydratase
GL50803_16039	20	hypothetical protein
GL50803_113797	27	VSP with INR
GL50803_15094	801	hypothetical protein
GL50803_10016	136	hypothetical protein
GL50803_113793	126	hypothetical protein
GL50803_16476	281	hypothetical protein
GL50803_14581	27	Chaperone protein DnaK HSP70
GL50803_40224	113	MDR protein-like protein
GL50803_19378	10	hypothetical protein
GL50803_14584	16	hypothetical protein
GL50803_7909	26	Amino acid transporter family
GL50803_19381	89	hypothetical protein
GL50803_14519	438	Cysteine desulfurase
GL50803_7718	502	DNA-damage inducible protein DDI1-like
GL50803_7717	10	hypothetical protein
GL50803_14521	22	Peroxiredoxin 1
GL50803_16596	66	hypothetical protein
GL50803_7723	34	hypothetical protein
GL50803_137749	22	hypothetical protein
GL50803_95593	75	Kinase, NEK
GL50803_102710	89	Ubiquitin carboxyl-terminal hydrolase 14
GL50803_5489	17	Kinase, NEK-frag
GL50803_16592	25	ABC transporter family protein
GL50803_113766	283	hypothetical protein
GL50803_21603	49	Protein 21.1
GL50803_38394	1550	Protein 21.1
GL50803_6751	11	hypothetical protein
GL50803_6752	69	hypothetical protein
GL50803_95563	46	Phosphorylase B kinase gamma catalytic chain
GL50803_6928	1337	hypothetical protein
GL50803_95549	1821	Kinase, NEK
GL50803_42377	517	hypothetical protein
GL50803_17308	3518	mRNA capping enzyme alpha subunit
GL50803_24842	165	Protein 21.1
GL50803_7394	11	hypothetical protein
GL50803_17312	117	hypothetical protein
GL50803_17315	36	Multidrug resistance ABC transporter ATP-binding and permease protein
GL50803_14104	17	hypothetical protein
GL50803_27708	1232	unspecified product
GL50803_6055	1086	FtsJ-like protein
GL50803_17316	301	Inorganic polyphosphate/ATP-NAD kinase, putative
GL50803_32234	1408	hypothetical protein
GL50803_6436	29	Guanine phosphoribosyltransferase
GL50803_6441	508	Ser/Thr protein phosphatase PP1-1
GL50803_6439	11	hypothetical protein
GL50803_14206	67	Protein 21.1
GL50803_7946	660	hypothetical protein
GL50803_7953	9	Arsenical pump-driving ATPase
GL50803_113723	32	hypothetical protein
GL50803_17320	207	Coiled-coil protein
GL50803_113722	538	hypothetical protein
GL50803_28832	19	hypothetical protein
GL50803_28831	17	Pseudouridylate synthase 1
GL50803_9427	17	hypothetical protein
GL50803_38462	14	hypothetical protein
GL50803_93358	18	Alcohol dehydrogenase
GL50803_5437	1361	hypothetical protein
GL50803_31340	422	hypothetical protein
GL50803_5435	56	Cyst wall protein 2
GL50803_38475	685	hypothetical protein
GL50803_31339	843	hypothetical protein
GL50803_137751	827	hypothetical protein
GL50803_4627	20	hypothetical protein
GL50803_4631	164	BC2-ORF2
GL50803_4507	10	CTP synthase/UTP-ammonia lyase
GL50803_4509	88	ERP1
GL50803_16089	1053	hypothetical protein
GL50803_3455	159	hypothetical protein
GL50803_34023	928	hypothetical protein
GL50803_7270	103	hypothetical protein
GL50803_7268	48	Protein 21.1
GL50803_137752	28	VSP
GL50803_15137	5	hypothetical protein
GL50803_10167	52	Coiled-coil protein
GL50803_102515	46	RNA-directed RNA polymerase, putative
GL50803_10162	49	hypothetical protein
GL50803_10161	92	hypothetical protein
GL50803_23888	17	FixW protein, putative
GL50803_114180	11	High cysteine membrane protein TMK-like
GL50803_31801	363	unspecified product
GL50803_103709	35	hypothetical protein
GL50803_16751	476	hypothetical protein
GL50803_6469	26	hypothetical protein
GL50803_6471	179	hypothetical protein
GL50803_34050	43	hypothetical protein
GL50803_95192	23	Protein 21.1
GL50803_31804	793	hypothetical protein
GL50803_14603	47	hypothetical protein
GL50803_7989	964	hypothetical protein
GL50803_7990	23	Translation elongation factor
GL50803_114165	1134	Cathepsin B-like cysteine proteinase 3 precursor
GL50803_100580	311	hypothetical protein
GL50803_15555	1456	ATP-dependent RNA helicase
GL50803_16681	188	hypothetical protein
GL50803_23556	273	hypothetical protein
GL50803_16157	51	hypothetical protein
GL50803_16156	16	hypothetical protein
GL50803_4985	523	hypothetical protein
GL50803_23552	308	hypothetical protein
GL50803_16159	132	hypothetical protein
GL50803_3528	191	hypothetical protein
GL50803_13382	918	hypothetical protein
GL50803_16160	11	Cathepsin B precursor
GL50803_3531	63	HZGJ
GL50803_101765	25	VSP
GL50803_17089	25	hypothetical protein
GL50803_17090	40	Giardia trophozoite antigen GTA-1
GL50803_17091	34	Exosome complex exonuclease, putative
GL50803_8496	19	Rac/Rho-like protein
GL50803_8497	734	RabF
GL50803_37353	1929	Ser/Thr protein kinase
GL50803_17092	797	hypothetical protein
GL50803_3593	23	Alcohol dehydrogenase lateral transfer candidate
GL50803_7317	30	unspecified product
GL50803_28165	83	hypothetical protein
GL50803_17094	1655	hypothetical protein
GL50803_112103	19	Arginine deiminase
GL50803_17097	29	Protein 21.1
GL50803_4705	45	hypothetical protein
GL50803_86593	78	hypothetical protein
GL50803_4708	481	hypothetical protein
GL50803_13608	21	Acetyl-CoA synthetase
GL50803_4356	32	hypothetical protein
GL50803_16925	104	hypothetical protein
GL50803_10885	22	4-alpha-glucanotransferase, amylo-alpha-1,6-glucosidase
GL50803_10882	24	hypothetical protein
GL50803_10880	506	hypothetical protein
GL50803_10881	31	hypothetical protein
GL50803_10879	209	hypothetical protein
GL50803_16924	9	20S proteasome alpha subunit 1
GL50803_10876	19	hypothetical protein
GL50803_10871	2708	hypothetical protein
GL50803_10870	54	Aspartyl-tRNA synthetase
GL50803_16922	114	hypothetical protein
GL50803_10868	29	hypothetical protein
GL50803_112079	19	Alpha-tubulin
GL50803_9307	35	Protein 21.1
GL50803_112076	14	Kinase, CDC7
GL50803_9327	35	Kinase, NEK
GL50803_14926	1	Protein 21.1
GL50803_96399	493	Spindle pole body protein, putative
GL50803_10239	112	hypothetical protein
GL50803_10238	81	hypothetical protein
GL50803_15148	398	Chaperone protein dnaJ
GL50803_10232	42	hypothetical protein
GL50803_115245	758	Coiled-coil protein
GL50803_5062	3120	hypothetical protein
GL50803_100900	1100	unspecified product
GL50803_6614	824	hypothetical protein
GL50803_14256	34	Histone H2A
GL50803_115239	21	Translation initiation factor IF-2, putative
GL50803_100906	42	Dynein heavy chain, putative
GL50803_40592	22	VSP with INR
GL50803_16824	17	Kinase, NEK
GL50803_16827	422	hypothetical protein
GL50803_28954	21	hypothetical protein
GL50803_97052	265	hypothetical protein
GL50803_16829	29	Calcineurin B subunit
GL50803_9778	74	Tem-1-like protein
GL50803_9779	7	UPL-1
GL50803_9780	11	hypothetical protein
GL50803_16830	643	Spindle pole protein, putative
GL50803_8471	23	Gp49, putative
GL50803_8468	9	hypothetical protein
GL50803_12108	29	Threonine dehydratase lateral transfer candidate
GL50803_12109	9	hypothetical protein
GL50803_12105	24	hypothetical protein
GL50803_12102	18	Elongation factor 1-gamma
GL50803_15576	89	Protein 21.1
GL50803_12095	9	Kinase, NEK-frag
GL50803_12093	49	hypothetical protein
GL50803_12091	21	Macrophage migration inhibitory factor
GL50803_15574	37	Alanyl dipeptidyl peptidase
GL50803_12081	500	O-linked GlcNAc transferase
GL50803_12074	1687	hypothetical protein
GL50803_15567	54	Rab2a
GL50803_12058	130	hypothetical protein
GL50803_12055	266	Elongation factor 2
GL50803_13452	933	Regulator of nonsense transcripts 1-like protein
GL50803_13220	893	ATP-dependent RNA helicase
GL50803_20764	1160	hypothetical protein
GL50803_3007	8	hypothetical protein
GL50803_17484	11	hypothetical protein
GL50803_94663	475	unspecified product
GL50803_3546	19	Kinase, NEK
GL50803_17482	13	TCP-1 chaperonin subunit alpha
GL50803_21943	33	hypothetical protein
GL50803_21942	22	NADP-specific glutamate dehydrogenase
GL50803_32381	609	hypothetical protein
GL50803_17478	30	Dynein heavy chain
GL50803_11354	9	hypothetical protein
GL50803_94582	30	Ornithine decarboxylase
GL50803_11364	39	Kinase, AGC AKT
GL50803_17476	74	CXC-rich protein
GL50803_13225	15	Zinc finger domain protein
GL50803_108452	3336	unspecified product
GL50803_21924	32	Kinase, NEK
GL50803_107659	15	hypothetical protein
GL50803_7296	16	U2 small nuclear ribonucleoprotein A', putative
GL50803_7287	16	Small glutamine-rich tetratricopeptide repeat-containing protein
GL50803_7285	83	hypothetical protein
GL50803_13539	21	hypothetical protein
GL50803_4097	1226	hypothetical protein
GL50803_16443	6	Protein phosphatase 2A B' regulatory subunit Wdb1
GL50803_41942	100	High cysteine membrane protein Group 6
GL50803_16444	10	Protein 21.1
GL50803_14915	45	hypothetical protein
GL50803_9262	52	hypothetical protein
GL50803_14916	165	Kinase, NEK
GL50803_9270	28	Dual specificity protein phosphatase CDC14A
GL50803_9272	325	Tubulin tyrosine ligase
GL50803_28779	9	hypothetical protein
GL50803_9276	10	Variant-specific surface protein
GL50803_35487	18	hypothetical protein
GL50803_15120	114	hypothetical protein
GL50803_102813	20	Protein 21.1
GL50803_115201	140	unspecified product
GL50803_40591	30	VSP
GL50803_115202	200	VSP
GL50803_14127	94	hypothetical protein
GL50803_27747	77	Flavohemoprotein B5+B5R
GL50803_6153	68	hypothetical protein
GL50803_17249	23	Coiled-coil protein
GL50803_3643	29	70 kDa peptidylprolyl isomerase, putative
GL50803_17251	16	IFT complex A
GL50803_28614	119	hypothetical protein
GL50803_8708	24	Eukaryotic translation initiation factor 1A
GL50803_8707	32	N-terminal acetyltransferase complex ARD1 subunit, putative
GL50803_17254	15	Phosphomannomutase-2
GL50803_8702	909	hypothetical protein
GL50803_14762	325	hypothetical protein
GL50803_17255	46	hypothetical protein
GL50803_4928	30	hypothetical protein
GL50803_94440	29	Dynein heavy chain
GL50803_36602	168	hypothetical protein
GL50803_31331	107	hypothetical protein
GL50803_7309	8	Syntaxin-like protein 1
GL50803_18856	907	hypothetical protein
GL50803_18172	466	hypothetical protein
GL50803_13668	69	hypothetical protein
GL50803_4602	688	Reductase, putative
GL50803_4606	34	Methionyl-tRNA synthetase
GL50803_17574	10	Coiled-coil protein
GL50803_94463	11	hypothetical protein
GL50803_17577	576	hypothetical protein
GL50803_9541	21	TRAPPC5/Trs31
GL50803_16180	17	Protein phosphatase methylesterase-1
GL50803_40067	24	hypothetical protein
GL50803_22291	10	hypothetical protein
GL50803_12830	24	hypothetical protein
GL50803_7680	64	Protein 21.1
GL50803_7679	10	Protein 21.1
GL50803_14510	316	Protein 21.1
GL50803_14509	254	hypothetical protein
GL50803_101168	67	Protein 21.1
GL50803_16504	45	hypothetical protein
GL50803_4410	42	SALP-1
GL50803_34141	144	Nin one binding protein-like protein
GL50803_4405	406	Kinase, TTK
GL50803_16506	1847	hypothetical protein
GL50803_16507	61	hypothetical protein
GL50803_16508	812	Kinase, NEK-frag
GL50803_16498	28	Nucleolar GTPase
GL50803_15085	322	hypothetical protein
GL50803_9948	387	hypothetical protein
GL50803_96324	634	hypothetical protein
GL50803_96306	891	hypothetical protein
GL50803_4538	11	hypothetical protein
GL50803_6633	42	Farnesyl diphosphate synthase
GL50803_17123	54	hypothetical protein
GL50803_6639	10	Protein 21.1
GL50803_32099	14	hypothetical protein
GL50803_27925	22	Protein 21.1
GL50803_101189	14	hypothetical protein
GL50803_17129	1669	hypothetical protein
GL50803_112416	335	hypothetical protein
GL50803_6464	46	hypothetical protein
GL50803_14213	9	hypothetical protein
GL50803_32102	239	unspecified product
GL50803_6458	631	hypothetical protein
GL50803_34093	9	hypothetical protein
GL50803_7081	414	hypothetical protein
GL50803_7082	34	Ribosomal protein S21
GL50803_17146	280	Helicase
GL50803_96264	16	hypothetical protein
GL50803_13988	723	hypothetical protein
GL50803_5632	24	Exosome complex exonuclease, putative
GL50803_137618	28	VSP
GL50803_17143	27	Pyruvate kinase
GL50803_6498	153	unspecified product
GL50803_102170	369	hypothetical protein
GL50803_15162	194	Ubiquitin-conjugating enzyme E2-17 kDa
GL50803_10291	97	hypothetical protein
GL50803_10297	681	U3 small nucleolar RNA interacting protein, putative
GL50803_15164	36	ATP-binding protein
GL50803_10299	4	hypothetical protein
GL50803_29140	68	hypothetical protein
GL50803_5859	41	hypothetical protein
GL50803_24512	250	Neurogenic locus notch-like protein
GL50803_27635	283	hypothetical protein
GL50803_16228	12	DNA-damage inducible protein DDI1-like
GL50803_16227	84	Protein 21.1
GL50803_16226	21	hypothetical protein
GL50803_16224	523	Kinesin-related protein
GL50803_94945	2144	unspecified product
GL50803_13393	616	Protein 21.1
GL50803_16222	296	hypothetical protein
GL50803_32898	272	hypothetical protein
GL50803_14091	11	Ribosomal protein L14
GL50803_38151	1002	unspecified product
GL50803_103606	21	hypothetical protein
GL50803_16670	45	hypothetical protein
GL50803_14380	4	hypothetical protein
GL50803_38182	1093	unspecified product
GL50803_16667	16	Acyl-CoA synthetase
GL50803_16668	32	hypothetical protein
GL50803_6417	1072	Gmyb11
GL50803_16663	20	hypothetical protein
GL50803_35275	2802	hypothetical protein
GL50803_89746	10	Pseudouridylate synthase, putative
GL50803_35267	701	hypothetical protein
GL50803_32460	917	unspecified product
GL50803_14318	32	hypothetical protein
GL50803_28022	80	hypothetical protein
GL50803_24861	2690	hypothetical protein
GL50803_13890	136	Phosphatidyl synthase
GL50803_5305	298	Protein 21.1
GL50803_113971	11	Transducin
GL50803_113970	447	hypothetical protein
GL50803_17583	59	hypothetical protein
GL50803_4165	670	NOD3 protein, putative
GL50803_4164	499	Met-10+ protein
GL50803_17584	10	hypothetical protein
GL50803_17587	18	CTP synthase
GL50803_9870	18	Kinase, NEK
GL50803_9865	35	hypothetical protein
GL50803_114937	56	Kinase, NEK
GL50803_15529	292	hypothetical protein
GL50803_15530	260	hypothetical protein
GL50803_17590	11	hypothetical protein
GL50803_11932	703	hypothetical protein
GL50803_31240	201	unspecified product
GL50803_15535	50	Deoxyhypusine synthase, putative
GL50803_15538	136	Eukaryotic translation initiation factor 5
GL50803_11950	26	Ribosomal protein L18
GL50803_11953	248	Coatomer alpha subunit
GL50803_102340	656	hypothetical protein
GL50803_114921	668	hypothetical protein
GL50803_11961	60	hypothetical protein
GL50803_17593	233	hypothetical protein
GL50803_114915	420	Cysteine protease
GL50803_11976	72	hypothetical protein
GL50803_28336	1002	hypothetical protein
GL50803_86815	9	hypothetical protein
GL50803_36905	313	unspecified product
GL50803_86821	58	Protein 21.1
GL50803_14566	106	Dipeptidyl-peptidase I precursor
GL50803_7843	26	hypothetical protein
GL50803_14567	27	hypothetical protein
GL50803_14568	85	Ser/Thr protein phosphatase PP1-alpha 2 catalytic subunit
GL50803_14569	181	hypothetical protein
GL50803_112875	324	hypothetical protein
GL50803_3746	24	hypothetical protein
GL50803_8741	89	Dipeptidyl-peptidase I precursor
GL50803_8742	23	Extracellular nuclease, putative
GL50803_112870	9	hypothetical protein
GL50803_8744	751	hypothetical protein
GL50803_112867	25	VSP
GL50803_8762	931	hypothetical protein
GL50803_28626	24	VSP
GL50803_23597	937	hypothetical protein
GL50803_90122	674	hypothetical protein
GL50803_36915	753	hypothetical protein
GL50803_6259	27	GA binding protein beta-1 chain
GL50803_23602	248	RTCB PROTEIN
GL50803_6262	210	Kinesin-3
GL50803_9365	102	Kinase, NEK
GL50803_14933	21	hypothetical protein
GL50803_20195	28	5-methylthioadenosine nucleosidase, S-adenosylhomocysteine nucleosidase
GL50803_102108	49	Clathrin heavy chain
GL50803_112846	14	Kinesin-3
GL50803_9493	27	Coiled-coil protein
GL50803_9492	389	Coiled-coil protein
GL50803_9489	8	V-SNARE
GL50803_3869	97	Syntaxin 16
GL50803_17074	2435	Coiled-coil protein
GL50803_2305	907	Intracellular protein transport protein USO1
GL50803_13164	29	hypothetical protein
GL50803_3467	64	hypothetical protein
GL50803_3465	11	hypothetical protein
GL50803_13360	30	Protein 21.1
GL50803_23620	171	hypothetical protein
GL50803_112831	381	Cysteine protease
GL50803_2926	839	hypothetical protein
GL50803_17214	79	Amino acid transporter system N2, putative
GL50803_15193	7	hypothetical protein
GL50803_15192	647	hypothetical protein
GL50803_10370	29	ATP/GTP binding protein, putative
GL50803_32908	253	hypothetical protein
GL50803_10367	10	Ribosomal protein S24
GL50803_5186	112	hypothetical protein
GL50803_5188	10	Protein 21.1
GL50803_17219	1402	Protein 21.1
GL50803_7610	89	hypothetical protein
GL50803_7608	561	hypothetical protein
GL50803_3209	12	Proteasome subunit beta type 2
GL50803_16772	125	hypothetical protein
GL50803_13288	136	hypothetical protein
GL50803_16773	34	hypothetical protein
GL50803_16774	121	Trichohyalin
GL50803_31833	518	hypothetical protein
GL50803_2825	19	Ribosomal protein L7Ae
GL50803_2897	155	Furin precursor putative serine protease
GL50803_25929	579	unspecified product
GL50803_16569	113	Transcriptional regulator, Sir2 family
GL50803_10755	46	Splicing factor 3A subunit 2
GL50803_10762	338	hypothetical protein
GL50803_10773	50	hypothetical protein
GL50803_29307	8	UTP-glucose-1-phosphate uridylyltransferase
GL50803_10778	48	hypothetical protein
GL50803_16567	38	Protein phosphatase PP2A regulatory subunit A
GL50803_15284	335	hypothetical protein
GL50803_3420	785	hypothetical protein
GL50803_3419	79	hypothetical protein
GL50803_3417	102	Preimplantation protein 3
GL50803_1376	935	hypothetical protein
GL50803_91911	29	Translation initiation factor eIF-2B alpha subunit
GL50803_3589	10	Ribosome biogenesis protein Brix
GL50803_3590	720	hypothetical protein
GL50803_91919	17	TCP-1 chaperonin subunit alpha
GL50803_16998	66	hypothetical protein
GL50803_17000	17	Peptidyl-prolyl cis-trans isomerase B precursor
GL50803_31998	34	hypothetical protein
GL50803_17005	137	Protein 21.6
GL50803_13438	44	Protein 21.1
GL50803_3763	148	Protein 21.4
GL50803_3760	14	Protein 21.1
GL50803_32838	23	hypothetical protein
GL50803_5375	48	Kinase, NEK
GL50803_5374	11	Tubulin specific chaperone B
GL50803_10551	1149	hypothetical protein
GL50803_15244	93	hypothetical protein
GL50803_86945	508	hypothetical protein
GL50803_28657	337	hypothetical protein
GL50803_8880	366	hypothetical protein
GL50803_8886	2412	Kinesin-14
GL50803_14796	13	hypothetical protein
GL50803_8892	20	hypothetical protein
GL50803_32757	628	hypothetical protein
GL50803_10423	56	hypothetical protein
GL50803_10422	256	hypothetical protein
GL50803_15204	100	ERP3
GL50803_17008	31	hypothetical protein
GL50803_96732	29	hypothetical protein
GL50803_4046	9	hypothetical protein
GL50803_4043	41	Serologically defined colon cancer antigen 1
GL50803_14045	79	hypothetical protein
GL50803_5866	20	hypothetical protein
GL50803_14046	52	hypothetical protein
GL50803_5871	226	Developmentally regulated GTP-binding protein 1
GL50803_14048	10	EB1
GL50803_5873	732	hypothetical protein
GL50803_14049	31	Ribosomal protein L32
GL50803_24528	41	hypothetical protein
GL50803_11311	49	Kinase, NEK
GL50803_16516	74	Xenotropic and polytropic murine leukemia virus receptor
GL50803_11309	35	High cysteine membrane protein Group 1
GL50803_36069	10	Ribosomal protein L34
GL50803_29487	14	Protein disulfide isomerase PDI1
GL50803_11299	7	Amino acid transporter, putative
GL50803_11297	34	hypothetical protein
GL50803_29481	77	unspecified product
GL50803_11290	1030	Kinase, CMGC CDK
GL50803_100987	40	hypothetical protein
GL50803_11287	48	Ribosomal protein L7Ae
GL50803_15386	9	Phosphatase similar to the C-terminal domain of histone macroH2A1
GL50803_40014	439	Protein 21.1
GL50803_90343	106	Kinase, Wnk
GL50803_4155	510	hypothetical protein
GL50803_4156	198	HIT family protein
GL50803_4149	32	hypothetical protein
GL50803_16371	22	Nucleolar GTP-binding protein 1, putative
GL50803_13735	1174	Protein 21.1
GL50803_16370	21	Transcriptional activator, putative
GL50803_87036	253	unspecified product
GL50803_16369	49	hypothetical protein
GL50803_14573	95	Tenascin-X
GL50803_7865	72	L-asparaginase
GL50803_16368	9	Ribosomal protein L31B
GL50803_7870	37	Ribosomal protein L23A
GL50803_7873	136	Yip interacting protein, putative
GL50803_7876	168	hypothetical protein
GL50803_7875	10	E04F6.2 like protein
GL50803_7878	17	Ribosomal protein S14
GL50803_9548	95	Cathepsin L precursor
GL50803_16380	8	Cathepsin L precursor
GL50803_14983	14	Cathepsin L precursor
GL50803_9558	54	Rab1a
GL50803_87023	179	unspecified product
GL50803_14989	359	hypothetical protein
GL50803_9573	9	hypothetical protein
GL50803_101326	109	hypothetical protein
GL50803_8682	23	Glucose-6-phosphate 1-dehydrogenase
GL50803_14759	17	6-phosphogluconate dehydrogenase, decarboxylating
GL50803_8692	36	hypothetical protein
GL50803_96460	10	Alanyl-tRNA synthetase
GL50803_137609	51	RNA polymerase II subunit Rpb5a
GL50803_87577	85	hypothetical protein
GL50803_16660	331	Intraflagellar transport particle protein IFT88
GL50803_9916	121	hypothetical protein
GL50803_16659	41	hypothetical protein
GL50803_9909	22	Pyruvate, phosphate dikinase
GL50803_15076	8	hypothetical protein
GL50803_16658	10	hypothetical protein
GL50803_9899	17	hypothetical protein
GL50803_9900	1358	hypothetical protein
GL50803_9896	105	hypothetical protein
GL50803_38244	45	hypothetical protein
GL50803_38222	393	hypothetical protein
GL50803_23756	70	hypothetical protein
GL50803_40228	793	hypothetical protein
GL50803_5812	20	VSP
GL50803_5811	71	Serine/threonine protein kinase
GL50803_5809	62	hypothetical protein
GL50803_16111	8	HSP70 subfamily B suppressor 1
GL50803_113357	28	VSP
GL50803_91198	28	Sigma adaptin
GL50803_21525	270	hypothetical protein
GL50803_32697	74	hypothetical protein
GL50803_2622	6	Phosphatidylinositol-4-phosphate 5-kinase, putative
GL50803_16404	3	hypothetical protein
GL50803_6413	75	hypothetical protein
GL50803_16406	238	Chaperone protein dnaJ
GL50803_21531	27	hypothetical protein
GL50803_6408	17	SnRNP Sm-like protein, putative
GL50803_113365	43	5'-3' exoribonuclease 2
GL50803_6404	11	Kinesin-9
GL50803_91220	10	Kinase, NEK
GL50803_100955	35	Mitotic spindle checkpoint protein MAD2
GL50803_40571	16	VSP
GL50803_10358	8	A-type flavoprotein lateral transfer candidate
GL50803_13791	87	ATP-dependent RNA helicase
GL50803_90089	36	hypothetical protein
GL50803_33301	157	hypothetical protein
GL50803_5002	10	hypothetical protein
GL50803_37418	745	hypothetical protein
GL50803_4079	67	Protein phosphatase PP2A regulatory subunit B
GL50803_41927	8	hypothetical protein
GL50803_4081	173	hypothetical protein
GL50803_37431	307	unspecified product
GL50803_2970	104	Translation initiation factor 2 gamma subunit
GL50803_10697	70	hypothetical protein
GL50803_10698	89	Phosphorylase B kinase gamma catalytic chain
GL50803_37426	193	hypothetical protein
GL50803_17431	944	hypothetical protein
GL50803_10703	53	Protein 21.1
GL50803_10708	9	hypothetical protein
GL50803_10711	30	Serine/Threonine protein phosphatase
GL50803_14299	8	hypothetical protein
GL50803_14298	371	hypothetical protein
GL50803_6812	116	hypothetical protein
GL50803_17427	11	hypothetical protein
GL50803_1894	79	U3 small nucleolar RNA-associated protein 11, putative
GL50803_17422	196	RNA polymerase I subunit A43
GL50803_32340	429	hypothetical protein
GL50803_15127	49	Deoxyribose-phosphate aldolase lateral transfer candidate
GL50803_15126	30	Derlin-like protein
GL50803_90767	634	Separase
GL50803_15125	9	hypothetical protein
GL50803_15124	22	Dynein light chain
GL50803_10136	310	hypothetical protein
GL50803_10137	973	Kinesin-9
GL50803_3349	132	hypothetical protein
GL50803_115129	46	hypothetical protein
GL50803_24122	38	Spindle pole protein, putative
GL50803_13555	88	hypothetical protein
GL50803_38556	1185	unspecified product
GL50803_14947	360	hypothetical protein
GL50803_9413	10	Protein disulfide isomerase PDI2
GL50803_9421	243	Kinase, NEK
GL50803_14950	108	hypothetical protein
GL50803_9422	5	Kinase, CMGC CDK
GL50803_15455	66	E04F6.2 like protein
GL50803_15454	103	hypothetical protein
GL50803_11621	19	hypothetical protein
GL50803_16808	51	hypothetical protein
GL50803_90710	16	hypothetical protein
GL50803_15451	1813	Spindle pole protein, putative
GL50803_15450	77	hypothetical protein
GL50803_11613	100	hypothetical protein
GL50803_15445	53	hypothetical protein
GL50803_19833	399	hypothetical protein
GL50803_15442	1316	hypothetical protein
GL50803_24133	292	5'-3' exoribonuclease 2
GL50803_11599	10	Lysophosphatidic acid phosphatase
GL50803_11595	42	hypothetical protein
GL50803_40630	28	VSP
GL50803_14109	28	ATP-binding protein
GL50803_103659	485	Zinc finger domain protein
GL50803_94762	68	hypothetical protein
GL50803_41569	571	hypothetical protein
GL50803_4812	23	Beta-giardin
GL50803_14493	173	Mre11, putative
GL50803_7598	283	hypothetical protein
GL50803_17362	158	hypothetical protein
GL50803_7593	57	hypothetical protein
GL50803_5247	593	hypothetical protein
GL50803_13874	104	hypothetical protein
GL50803_27423	2585	hypothetical protein
GL50803_13875	200	Phosphatase
GL50803_13876	102	WD-repeat protein 5
GL50803_5258	8	hypothetical protein
GL50803_17364	29	Ribosomal protein S26
GL50803_17365	365	hypothetical protein
GL50803_17366	401	Pyridoxamine 5-phosphate oxidase, putative
GL50803_13262	180	hypothetical protein
GL50803_17368	7	Kinase, ULK
GL50803_15604	14	hypothetical protein
GL50803_12230	1051	hypothetical protein
GL50803_12229	74	hypothetical protein
GL50803_29796	156	hypothetical protein
GL50803_12223	55	Kinase, NAK
GL50803_15600	12	hypothetical protein
GL50803_12218	22	hypothetical protein
GL50803_12217	47	hypothetical protein
GL50803_12215	583	S-adenosylmethionine-dependent methyltransferase, putative
GL50803_12216	11	Vacuolar ATP synthase subunit B
GL50803_15598	57	Vacuolar ATP synthase 16 kDa proteolipid subunit
GL50803_103981	736	hypothetical protein
GL50803_21897	51	hypothetical protein
GL50803_88369	17	Protein 21.1
GL50803_14254	16	Protein 21.1
GL50803_27918	14	hypothetical protein
GL50803_113021	1381	Acetyl-CoA carboxylase/pyruvate carboxylase fusion protein, putative
GL50803_13756	91	Proteasome subunit beta type 3
GL50803_10516	8	Leucine carboxyl methyltransferase
GL50803_13007	53	Zinc finger domain protein
GL50803_4692	55	hypothetical protein
GL50803_4687	36	hypothetical protein
GL50803_13700	9	hypothetical protein
GL50803_93671	44	Casein kinase II beta chain
GL50803_14093	21	hypothetical protein
GL50803_6035	2021	Protein 21.1
GL50803_14095	37	Replication factor C, subunit 4
GL50803_17378	920	Kinase
GL50803_112978	349	Chromodomain helicase-DNA-binding protein, putative
GL50803_104087	371	VSP, putative
GL50803_21318	71	hypothetical protein
GL50803_32861	185	hypothetical protein
GL50803_5744	7	Sec61-alpha
GL50803_15983	30	Prolyl-tRNA synthetase
GL50803_15985	1684	hypothetical protein
GL50803_27602	38	hypothetical protein
GL50803_93551	31	Metalloprotease, insulinase family
GL50803_14019	30	Cathepsin B precursor
GL50803_93543	3210	unspecified product
GL50803_16245	12	hypothetical protein
GL50803_3279	89	Ribonuclease
GL50803_112810	24	hypothetical protein
GL50803_5638	37	Cyst wall protein 1
GL50803_16840	91	Trichohyalin
GL50803_16841	669	DinF protein
GL50803_5643	74	Kinase
GL50803_26739	117	hypothetical protein
GL50803_37286	1417	hypothetical protein
GL50803_16844	27	hypothetical protein
GL50803_4852	24	hypothetical protein
GL50803_93548	25	Phospholipase B
GL50803_16450	21	Radial-spoke protein
GL50803_8367	25	VATPase
GL50803_14689	456	hypothetical protein
GL50803_8364	892	Thymidine kinase
GL50803_8359	578	hypothetical protein
GL50803_8360	17	Acid sphingomyelinase-like phosphodiesterase 3b precursor
GL50803_8358	64	hypothetical protein
GL50803_38691	772	hypothetical protein
GL50803_13922	70	hypothetical protein
GL50803_5443	198	hypothetical protein
GL50803_104173	27	Isoleucyl-tRNA synthetase
GL50803_16519	10	AstB/chuR-related protein
GL50803_10919	64	Ribosomal protein S10B
GL50803_10924	2188	hypothetical protein
GL50803_16520	85	Sec24-like
GL50803_15317	16	High cysteine membrane protein Group 1
GL50803_16522	16	hypothetical protein
GL50803_19436	17	Ribosomal protein L7
GL50803_24947	9	hypothetical protein
GL50803_10939	23	hypothetical protein
GL50803_16526	8	WD-repeat protein
GL50803_112801	24	VSP
GL50803_2875	570	unspecified product
GL50803_2876	151	UBC2, putative
GL50803_24043	161	hypothetical protein
GL50803_4235	9	Nuclear LIM interactor-interacting factor 1
GL50803_13575	29	Dynein light chain
GL50803_4239	43	hypothetical protein
GL50803_24039	345	unspecified product
GL50803_13622	7	hypothetical protein
GL50803_31837	497	unspecified product
GL50803_16779	16	Cathepsin B precursor
GL50803_112784	309	hypothetical protein
GL50803_11149	24	hypothetical protein
GL50803_31896	626	hypothetical protein
GL50803_39416	324	hypothetical protein
GL50803_24603	723	hypothetical protein
GL50803_11139	40	hypothetical protein
GL50803_29424	143	hypothetical protein
GL50803_42780	12	hypothetical protein
GL50803_11131	15	hypothetical protein
GL50803_11129	28	hypothetical protein
GL50803_16867	31	AAA family ATPase
GL50803_27055	52	Ubiquitin-conjugating enzyme E2-17 kDa 3
GL50803_27056	77	hypothetical protein
GL50803_4324	471	hypothetical protein
GL50803_104248	46	hypothetical protein
GL50803_1774	58	Zinc finger domain protein
GL50803_15383	9	Peroxiredoxin 1
GL50803_38650	245	hypothetical protein
GL50803_15382	9	hypothetical protein
GL50803_11246	51	hypothetical protein
GL50803_17571	341	Trichohyalin
GL50803_17569	338	hypothetical protein
GL50803_4596	17	Ethanolamine kinase, putative
GL50803_17566	75	Kinase, CAMK CAMKL
GL50803_2362	13	hypothetical protein
GL50803_13708	956	Ubiquitin
GL50803_4711	15	hypothetical protein
GL50803_17563	17	Kinase, CMGC MAPK
GL50803_12885	35	hypothetical protein
GL50803_12853	36	Molybdopterin biosynthesis MoeB protein
GL50803_17561	31	ARF GAP
GL50803_17559	1788	hypothetical protein
GL50803_17558	16	Kinase, CMGC DYRK
GL50803_8044	19	Seven transmembrane protein 1
GL50803_95162	38	Tenascin-like
GL50803_14616	890	Hypothetical protein
GL50803_8038	32	Hypothetical protein
GL50803_8037	15	Kinase, CMGC CDK
GL50803_14615	10	Hypothetical protein
GL50803_14614	13	Eukaryotic translation initiation factor 5A
GL50803_16311	44	Centromere/microtubule binding protein CBF5
GL50803_16310	28	Ribosomal protein L27a
GL50803_22165	48	Kinase, STE STE20
GL50803_8446	736	hypothetical protein
GL50803_8444	29	MDR-type permease
GL50803_32020	951	hypothetical protein
GL50803_8438	10	Protein 21.1
GL50803_95661	654	Tubulin tyrosine ligase
GL50803_17025	39	Nuclear ATP/GTP-binding protein
GL50803_14277	4	N-acetyltransferase-like protein
GL50803_6700	92	Kinase, CMGC RCK
GL50803_15250	62	High cysteine membrane protein Group 6
GL50803_113304	29	VSP
GL50803_16363	22	Alanine aminotransferase, putative
GL50803_3755	394	hypothetical protein
GL50803_2573	806	unspecified product
GL50803_23655	1610	hypothetical protein
GL50803_94542	209	hypothetical protein
GL50803_3896	12	Sec61-gamma
GL50803_16297	947	hypothetical protein
GL50803_16298	43	hypothetical protein
GL50803_5333	11	Calmodulin
GL50803_113290	1184	hypothetical protein
GL50803_2834	50	ARF GAP
GL50803_16300	171	Protein 21.1
GL50803_113284	6	hypothetical protein
GL50803_26121	324	unspecified product
GL50803_1890	12	3 exoribonuclease, putative
GL50803_17053	22	Protein 21.1
GL50803_91480	128	STU2-like protein
GL50803_4644	289	hypothetical protein
GL50803_113273	582	hypothetical protein
GL50803_17051	1050	Protein 21.1
GL50803_91476	239	hypothetical protein
GL50803_96616	24	Kinase, CMGC CDKL
GL50803_27836	62	Protein 21.1
GL50803_96605	504	hypothetical protein
GL50803_17157	2496	Phosphatase subunit gene g4-1
GL50803_112630	113	hypothetical protein
GL50803_10038	13	Alpha-18 giardin
GL50803_15101	24	Alpha-17 giardin
GL50803_10036	65	Alpha-16 giardin
GL50803_10033	182	hypothetical protein
GL50803_15099	108	20S proteasome alpha subunit 4
GL50803_17155	24	hypothetical protein
GL50803_10027	82	hypothetical protein
GL50803_13999	495	hypothetical protein
GL50803_17154	287	hypothetical protein
GL50803_17153	24	Alpha-11 giardin
GL50803_5649	15	Alpha-10 giardin
GL50803_5648	29	hypothetical protein
GL50803_17151	20	NADPH oxidoreductase, putative
GL50803_17150	11	NADPH oxidoreductase, putative
GL50803_7590	9	hypothetical protein
GL50803_20307	520	hypothetical protein
GL50803_7588	71	Serine/threonine protein phosphatase 7
GL50803_14488	39	Cyclin A
GL50803_7579	7	Kinase, NEK-frag
GL50803_7578	22	Dynein light chain
GL50803_17149	50	GTP-binding protein
GL50803_7577	320	hypothetical protein
GL50803_116713	413	hypothetical protein
GL50803_2338	61	hypothetical protein
GL50803_15110	21	hypothetical protein
GL50803_16376	11	ATP-dependent RNA helicase p47, putative
GL50803_34684	16	DEAD box RNA helicase Vasa
GL50803_10091	16	Ribosomal protein L23
GL50803_16373	212	hypothetical protein
GL50803_39904	100	High cysteine membrane protein Group 2
GL50803_26800	256	hypothetical protein
GL50803_15868	640	Mitogen-activated protein kinase kinase kinase 1
GL50803_15867	508	GTP-binding protein
GL50803_15869	80	GTP-binding nuclear protein RAN/TC4
GL50803_22850	55	Kinase, CMGC MAPK
GL50803_88735	109	Protein 21.1
GL50803_16263	35	Sjogren's syndrome nuclear autoantigen 1-like protein
GL50803_88730	180	unspecified product
GL50803_12949	22	Proteasome subunit beta type 5 precursor
GL50803_12950	10	Ubiquitin-conjugating enzyme E2-17 kDa
GL50803_16264	10	WD-40 repeat protein
GL50803_16265	9	Ribosomal protein S3a
GL50803_8415	58	hypothetical protein
GL50803_14702	26	RRNA biogenesis protein RRP5
GL50803_8410	315	hypothetical protein
GL50803_22855	21	hypothetical protein
GL50803_8407	7	Aminoacyl-histidine dipeptidase
GL50803_16266	51	hypothetical protein
GL50803_8405	18	hypothetical protein
GL50803_22857	193	unspecified product
GL50803_16267	10	hypothetical protein
GL50803_8657	720	hypothetical protein
GL50803_16114	38	Ribosomal protein L36-1
GL50803_8652	35	hypothetical protein
GL50803_14753	24	Histone acetyltransferase type B subunit 2
GL50803_8650	9	hypothetical protein
GL50803_15897	30	hypothetical protein
GL50803_25809	1252	hypothetical protein
GL50803_16078	1621	hypothetical protein
GL50803_16076	15	Peroxiredoxin 1
GL50803_4463	33	Dynein light chain
GL50803_9030	66	Protein 21.1
GL50803_14841	9	Phosphoglycolate phosphatase
GL50803_9036	88	hypothetical protein
GL50803_9038	19	Nicotinate phosphoribosyltransferase
GL50803_34526	1004	hypothetical protein
GL50803_9045	8	hypothetical protein
GL50803_14845	1391	hypothetical protein
GL50803_9046	567	Sugar transport family protein
GL50803_14846	341	hypothetical protein
GL50803_14456	176	Low molecular weight protein-tyrosine-phosphatase
GL50803_14457	10	Ripening regulated protein DDTFR19
GL50803_14458	154	Hypothetical protein
GL50803_7444	64	Hypothetical protein
GL50803_13109	190	RabA
GL50803_24505	55	Hypothetical protein
GL50803_15847	28	Hypothetical protein
GL50803_2732	112	Hypothetical protein
GL50803_15958	1097	Ser/Thr protein kinase
GL50803_113219	329	Hypothetical protein
GL50803_14586	27	VSP with INR
GL50803_17104	166	hypothetical protein
GL50803_17105	36	IFT complex B
GL50803_6422	578	hypothetical protein
GL50803_17106	9	26S protease regulatory subunit 8
GL50803_37736	614	unspecified product
GL50803_27852	65	hypothetical protein
GL50803_6427	34	Major facilitator family transporter
GL50803_92333	210	unspecified product
GL50803_6430	27	14-3-3 protein
GL50803_17109	14	Vacuolar protein sorting 11
GL50803_17110	465	hypothetical protein
GL50803_1657	232	Translation initiation factor
GL50803_17112	84	U3 small nucleolar ribonucleoprotein protein IMP4, putative
GL50803_102036	464	unspecified product
GL50803_102034	15	Kinase, NEK-frag
GL50803_8820	470	Spindle pole protein, putative
GL50803_8819	1414	Protein required for cell viability
GL50803_8821	24	hypothetical protein
GL50803_8826	9	Glucokinase
GL50803_14783	33	High cysteine protein
GL50803_104031	450	Glycogen synthase, putative
GL50803_2366	25	hypothetical protein
GL50803_7103	46	Kinase, NEK
GL50803_7110	24	Ubiquitin
GL50803_14364	69	Kinase, CAMK CAMKL
GL50803_16550	107	hypothetical protein
GL50803_16554	29	Splicing factor U2AF subunit, putative
GL50803_32730	15	hypothetical protein
GL50803_13901	1999	Protein 21.1
GL50803_86744	29	unspecified product
GL50803_7728	260	Protein 21.1
GL50803_8023	843	hypothetical protein
GL50803_6563	28	Uracil phosphoribosyltransferase
GL50803_14241	9	hypothetical protein
GL50803_27900	1582	unspecified product
GL50803_6558	271	hypothetical protein
GL50803_6559	810	hypothetical protein
GL50803_24400	1266	Kinase, NEK
GL50803_16573	411	hypothetical protein
GL50803_16572	10	N-terminal acetyltransferase complex ARD1 subunit, putative
GL50803_15049	7	Kinase, NEK
GL50803_28962	81	hypothetical protein
GL50803_9803	43	La ribonucleoprotein, putative
GL50803_34789	488	unspecified product
GL50803_9808	29	Chaperone protein DnaJ
GL50803_9810	31	Ribosomal protein L44
GL50803_15054	9	Kelch repeat-containing protein
GL50803_104685	28	Caltractin
GL50803_16575	41	ABC transporter family protein
GL50803_33809	807	hypothetical protein
GL50803_13864	18	Heat shock protein HSP 90-alpha
GL50803_13863	48	hypothetical protein
GL50803_33807	363	Protein 21.1
GL50803_90950	816	ATP-dependent RNA helicase
GL50803_24194	10	Protein 21.1
GL50803_8172	46	Dynein heavy chain
GL50803_8173	15	Glycerol kinase
GL50803_14655	55	hypothetical protein
GL50803_16464	1423	hypothetical protein
GL50803_31598	454	hypothetical protein
GL50803_3564	40	hypothetical protein
GL50803_6283	273	hypothetical protein
GL50803_16339	1094	Glucoamylase S1/S2 precursor
GL50803_6284	6	Protein 21.1
GL50803_6377	80	hypothetical protein
GL50803_113871	147	hypothetical protein
GL50803_113876	740	ABC transporter, ATP-binding protein, putative
GL50803_14626	10	Oxidoreductase, short chain dehydrogenase/reductase family
GL50803_13512	10	TFIIH P34
GL50803_2007	77	hypothetical protein
GL50803_16054	10	hypothetical protein
GL50803_36943	542	hypothetical protein
GL50803_13103	63	hypothetical protein
GL50803_14677	866	hypothetical protein
GL50803_28477	35	hypothetical protein
GL50803_16354	59	Protein 21.1
GL50803_8260	52	hypothetical protein
GL50803_113892	24	Long chain fatty acid CoA ligase, putative
GL50803_16353	8	hypothetical protein
GL50803_8253	163	hypothetical protein
GL50803_8254	331	hypothetical protein with antisense transcription
GL50803_24818	125	hypothetical protein
GL50803_20037	1253	Histone H3
GL50803_3341	366	hypothetical protein
GL50803_20034	724	unspecified product
GL50803_14704	10	hypothetical protein
GL50803_8423	25	hypothetical protein
GL50803_8426	40	hypothetical protein
GL50803_8427	26	Transcriptional repressor NOT4Hp, putative
GL50803_36983	251	hypothetical protein
GL50803_8429	10	Minor histocompatibility antigen H13
GL50803_8432	238	APC11, cyclin metabolism
GL50803_8433	8	hypothetical protein
GL50803_8782	41	Protein required for cell viability
GL50803_8781	77	Yip paralog
GL50803_103818	385	hypothetical protein
GL50803_91714	1322	unspecified product
GL50803_16948	453	Nucleolar protein NOP2
GL50803_91707	49	High cysteine membrane protein Group 1
GL50803_35428	20	Valine-tRNA ligase
GL50803_16737	2317	Acid sphingomyelinase-like phosphodiesterase 3b precursor
GL50803_103810	14	Protein 21.1
GL50803_103807	24	Protein 21.1
GL50803_13475	23	Axoneme-associated protein GASP-180
GL50803_11099	20	Protein 21.1
GL50803_17120	124	CEGP1 protein
GL50803_15338	1286	Kinase, NEK-frag
GL50803_11100	353	TRP domain containing protein
GL50803_11105	22	hypothetical protein
GL50803_17119	48	hypothetical protein
GL50803_11116	85	hypothetical protein
GL50803_11118	24	Enolase
GL50803_17118	538	U2 small nuclear ribonucleoprotein A, putative
GL50803_14651	42	Glucosamine 6-phosphate N-acetyltransferase
GL50803_8163	8	Manganese-dependent inorganic pyrophosphatase, putative
GL50803_14649	38	hypothetical protein
GL50803_14648	65	Kinase, NEK-frag
GL50803_8152	37	Kinase, NEK
GL50803_17116	17	hypothetical protein
GL50803_17115	52	hypothetical protein
GL50803_101496	34	VSP
GL50803_6980	7	DNA pol/primase, large sub
GL50803_16050	9	hypothetical protein
GL50803_92760	12	hypothetical protein
GL50803_23833	41	Vacuolar protein sorting 35
GL50803_4767	9	Protein 21.1
GL50803_33672	37	hypothetical protein
GL50803_8078	4	hypothetical protein
GL50803_42676	10	hypothetical protein
GL50803_16537	52	Protein 21.1
GL50803_2779	223	Protein 21.1
GL50803_33674	575	hypothetical protein
GL50803_13127	16	Proteasome subunit beta type 1
GL50803_16535	362	Tubulin specific chaperone E
GL50803_31661	1126	hypothetical protein
GL50803_6919	68	hypothetical protein
GL50803_6917	10	hypothetical protein
GL50803_14321	39	Ribosomal protein L30
GL50803_2509	224	hypothetical protein
GL50803_2508	21	hypothetical protein
GL50803_9720	22	Protein 21.1
GL50803_9719	10	NADH oxidase
GL50803_93294	36	hypothetical protein
GL50803_17284	35	Protein 21.1
GL50803_14858	696	hypothetical protein
GL50803_14859	29	Protein 21.1
GL50803_9079	17	ERP2
GL50803_14857	648	hypothetical protein
GL50803_14856	11	Signal recognition particle receptor
GL50803_38853	261	unspecified product
GL50803_9073	10	Dual-specificity protein phosphatase
GL50803_17283	10	hypothetical protein
GL50803_6483	12	Ribonuclease HI, large sub
GL50803_27878	66	hypothetical protein
GL50803_6490	21	Protein 21.1
GL50803_6492	171	hypothetical protein
GL50803_17280	9	hypothetical protein
GL50803_17278	16	hypothetical protein
GL50803_32206	53	hypothetical protein
GL50803_13524	228	Phosphatase
GL50803_103895	803	hypothetical protein
GL50803_11449	125	ATPase of the PP-loop superfamily implicated in cell cycle control, putative
GL50803_11446	42	hypothetical protein
GL50803_112729	289	Kinesin like protein
GL50803_11436	10	Molybdopterin biosynthesis MoeB protein
GL50803_15416	25	hypothetical protein
GL50803_92729	56	Fatty acid elongase 1
GL50803_25618	843	hypothetical protein
GL50803_3713	48	hypothetical protein
GL50803_92739	15	ATP-dependent RNA helicase A
GL50803_23235	326	Axoneme-associated protein GASP-180
GL50803_19364	3	hypothetical protein
GL50803_16472	19	VSP
GL50803_16471	422	hypothetical protein
GL50803_137713	11	hypothetical protein
GL50803_33660	8	Spindle pole protein, putative
GL50803_16468	8	Cathepsin B precursor
GL50803_3287	170	Acetyl-CoA acetyltransferase
GL50803_7203	16	Guanylate kinase
GL50803_7204	37	hypothetical protein
GL50803_14392	20	Metallo-beta-lactamase superfamily protein
GL50803_7207	31	hypothetical protein
GL50803_8913	311	Hydroxyacylglutathione hydrolase
GL50803_8916	61	Signal recognition particle 68kDa
GL50803_28666	1525	Diphthine synthase
GL50803_8917	40	Mu adaptin
GL50803_8920	181	Zinc finger domain protein
GL50803_16745	40	Axoneme-associated protein GASP-180
GL50803_33663	395	hypothetical protein
GL50803_13478	168	ARL1
GL50803_105464	267	unspecified product
GL50803_9283	539	hypothetical protein
GL50803_30448	626	hypothetical protein
GL50803_38723	358	unspecified product
[truncated: 498 more rows]

## Sheet: Doubles
gene_id	short_utr	long_utr	product_description
GL50803_4946	109	1130	Peptide methionine sulfoxide reductase msrA
GL50803_9658	10	42	Kinase, NEK
GL50803_16013	9	190	Spindle pole protein, putative
GL50803_5458	13	29	hypothetical protein
GL50803_17172	568	1603	hypothetical protein
GL50803_10196	28	1203	hypothetical protein
GL50803_37532	225	240	hypothetical protein
GL50803_103202	4	879	hypothetical protein
GL50803_23447	18	60	hypothetical protein
GL50803_20001	1056	1078	unspecified product
GL50803_5926	1179	2662	Protein 21.1
GL50803_5661	37	57	RNA binding protein
GL50803_7240	115	140	hypothetical protein
GL50803_16638	807	829	hypothetical protein
GL50803_3780	430	442	unspecified product
GL50803_14679	55	938	Protein 21.1
GL50803_101919	118	1664	5-AMP-activated protein kinase, beta-1 subunit
GL50803_114209	21	45	hypothetical protein
GL50803_16202	8	21	Axoneme central apparatus protein
GL50803_10976	104	1189	Nuclear ATP/GTP-binding protein
GL50803_17304	11	55	Alpha adaptin
GL50803_2400	120	140	Ribonuclease P protein subunit, putative
GL50803_16887	37	566	ATP-dependent RNA helicase HAS1, putative
GL50803_2980	46	259	20S proteasome alpha subunit 5
GL50803_27887	86	984	hypothetical protein
GL50803_16601	267	318	hypothetical protein
GL50803_7350	452	1417	hypothetical protein
GL50803_14608	696	3253	Rho GAP, putative
GL50803_40793	2173	2193	hypothetical protein
GL50803_15398	6	74	Chaperone protein dnaJ
GL50803_15399	285	326	hypothetical protein
GL50803_14787	709	1474	Type II inositol-1,4,5-trisphosphate 5-phosphatase precursor
GL50803_16326	34	247	Protein 21.1
GL50803_3920	1177	1288	hypothetical protein
GL50803_7323	198	214	hypothetical protein
GL50803_86431	690	826	hypothetical protein
GL50803_4331	9	24	26S proteasome non-ATPase regulatory subunit 6
GL50803_9697	861	880	hypothetical protein
GL50803_34160	22	44	Hypothetical protein
GL50803_16251	4896	5418	Kinase, NEK
GL50803_3206	28	578	Pyruvate kinase
GL50803_114698	88	111	hypothetical protein
GL50803_16944	1101	1113	hypothetical protein
GL50803_8610	92	267	Coiled-coil protein
GL50803_38005	348	360	hypothetical protein
GL50803_42357	20	37	hypothetical protein
GL50803_5772	16	697	CDC72
GL50803_16090	485	1320	Ubiquitin carboxyl-terminal hydrolase 4
GL50803_37145	964	2040	unspecified product
GL50803_33689	55	1572	Dipeptidyl-peptidase III
GL50803_7982	31	50	UDP-glucose 4-epimerase
GL50803_12035	15	39	hypothetical protein
GL50803_112112	17	138	hypothetical protein
GL50803_4357	31	43	Phosphatase, putative
GL50803_11359	10	34	Ribosomal protein S4
GL50803_3021	247	293	hypothetical protein
GL50803_14126	814	989	hypothetical protein
GL50803_3983	156	172	5' nucleotidase family protein
GL50803_36515	321	746	hypothetical protein
GL50803_14507	22	54	hypothetical protein
GL50803_6455	418	1515	hypothetical protein
GL50803_96364	841	1535	hypothetical protein
GL50803_3570	43	66	Ribosomal protein S28
GL50803_22003	369	385	Ser/Thr protein kinase
GL50803_32896	258	276	unspecified product
GL50803_32893	353	375	hypothetical protein
GL50803_34179	42	201	hypothetical protein
GL50803_13055	591	604	Protein 21.1
GL50803_29708	305	771	hypothetical protein
GL50803_9487	53	82	Kinase
GL50803_17216	128	202	Kinase, NEK
GL50803_10374	1294	1345	Protein 21.1
GL50803_10765	1008	1701	MCM7
GL50803_16568	197	497	Transcription factor, putative
GL50803_10783	409	904	Thiosulfate sulfurtransferase
GL50803_13437	9	29	Protein 21.1
GL50803_5372	365	394	unspecified product
GL50803_40016	4	39	Protein 21.1
GL50803_5277	225	1257	hypothetical protein
GL50803_16405	366	415	hypothetical protein
GL50803_13790	734	1039	hypothetical protein
GL50803_17434	843	1205	hypothetical protein
GL50803_24126	523	1220	hypothetical protein
GL50803_14492	47	1036	hypothetical protein
GL50803_15605	11	38	hypothetical protein
GL50803_12220	3	175	Hydrolase, putative
GL50803_101866	261	628	Kinase, NEK
GL50803_11151	45	57	hypothetical protein
GL50803_15353	192	833	hypothetical protein
GL50803_11237	265	378	hypothetical protein
GL50803_95653	8	1308	Coiled-coil protein
GL50803_16365	9	82	hypothetical protein
GL50803_8654	135	244	hypothetical protein
GL50803_16077	1253	1377	hypothetical protein
GL50803_2461	410	708	hypothetical protein
GL50803_31688	122	204	unspecified product
GL50803_103164	813	1988	H-SHIPPO 1
GL50803_3141	2718	2732	hypothetical protein
GL50803_13101	981	1061	Basic, immunoglobulin-like variable motif-containing protein
GL50803_16733	52	1133	Kinase, NEK-frag
GL50803_14650	712	725	Ser/Thr phosphatase 2C, putative
GL50803_8075	1498	1510	hypothetical protein
GL50803_8074	4	1040	Manganese-dependent inorganic pyrophosphatase, putative
GL50803_37109	98	161	hypothetical protein
GL50803_11434	10	26	20S proteasome alpha subunit 2
GL50803_14921	54	250	hypothetical protein
GL50803_17229	589	938	hypothetical protein
GL50803_3475	459	485	Protein 21.1
GL50803_31983	366	406	hypothetical protein
GL50803_16021	1343	1385	hypothetical protein
GL50803_15476	128	140	Protein 21.1
GL50803_3706	11	1181	DNA pol epsilon, sub B
GL50803_6687	24	488	Glyceraldehyde 3-phosphate dehydrogenase
GL50803_15918	13	28	hypothetical protein
GL50803_21512	271	313	S-adenosylmethionine-dependent methyltransferase, putative
GL50803_5522	189	206	hypothetical protein
GL50803_5513	9	239	hypothetical protein
GL50803_23389	55	412	hypothetical protein
GL50803_102654	9	44	hypothetical protein
GL50803_92645	57	89	5' nucleotidase family protein
GL50803_7559	141	471	hypothetical protein
GL50803_9751	118	166	Chaperone protein dnaJ
GL50803_5345	223	1539	DinF protein
GL50803_14993	41	133	Pyrophosphate-fructose 6-phosphate 1-phosphotransferase alpha subunit
GL50803_9353	161	2597	hypothetical protein
GL50803_9349	30	1839	hypothetical protein, similar to AMMECR1
GL50803_3679	36	81	hypothetical protein
GL50803_14119	563	642	Zinc finger domain protein
GL50803_13200	845	939	RNA helicase, putative
GL50803_17460	11	35	G1 to S phase transition protein 1, putative
GL50803_10063	203	1619	hypothetical protein
GL50803_102703	1262	1382	unspecified product

## Sheet: Triple
gene_id	short_utr	mid_utr	long_utr	product_description
GL50803_17449	221	359	1777	RIO1-like protein
